# Supplementary material for: A study protocol for a phase II randomised, double-blind, placebo-controlled trial of sodium selenate as a disease-modifying treatment for behavioural variant frontotemporal dementia
Source: PubMed Central journal article supplement — BMJ Open. 2020 Nov 16;10(11):e040100. doi: 10.1136/bmjopen-2020-040100 (PMC7670941; doi:10.1136/bmjopen-2020-040100), 2020-11-16
Supplement: bmjopen-2020-040100.draft_revisions.pdf [file bmjopen-2020-040100.draft_revisions.pdf]

# BMJ Open

BMJ Open is committed to open peer review. As part of this commitment we make the peer review history of every article we publish publicly available.

When an article is published we post the peer reviewers' comments and the authors' responses online. We also post the versions of the paper that were used during peer review. These are the versions that the peer review comments apply to.

The versions of the paper that follow are the versions that were submitted during the peer review process. They are not the versions of record or the final published versions. They should not be cited or distributed as the published version of this manuscript.

BMJ Open is an open access journal and the full, final, typeset and author-corrected version of record of the manuscript is available on our site with no access controls, subscription charges or pay-per-view fees (<http://bmjopen.bmj.com>).

If you have any questions on BMJ Open's open peer review process please email [info.bmjopen@bmj.com](mailto:info.bmjopen@bmj.com)

# BMJ Open

## A study protocol for a phase II randomised, double-blind, placebo-controlled trial of sodium selenate as a disease-modifying treatment for behavioural variant frontotemporal dementia

|                               |                                                                                                                                                                                                                                                                                                                                                                                                                                                                                                                                                                                                                                                                                                                                                                                                                                                                                                                                                                                                                                                                                                                                                                                                                                                                                                                                            |
|-------------------------------|--------------------------------------------------------------------------------------------------------------------------------------------------------------------------------------------------------------------------------------------------------------------------------------------------------------------------------------------------------------------------------------------------------------------------------------------------------------------------------------------------------------------------------------------------------------------------------------------------------------------------------------------------------------------------------------------------------------------------------------------------------------------------------------------------------------------------------------------------------------------------------------------------------------------------------------------------------------------------------------------------------------------------------------------------------------------------------------------------------------------------------------------------------------------------------------------------------------------------------------------------------------------------------------------------------------------------------------------|
| Journal:                      | <i>BMJ Open</i>                                                                                                                                                                                                                                                                                                                                                                                                                                                                                                                                                                                                                                                                                                                                                                                                                                                                                                                                                                                                                                                                                                                                                                                                                                                                                                                            |
| Manuscript ID                 | bmjopen-2020-040100                                                                                                                                                                                                                                                                                                                                                                                                                                                                                                                                                                                                                                                                                                                                                                                                                                                                                                                                                                                                                                                                                                                                                                                                                                                                                                                        |
| Article Type:                 | Protocol                                                                                                                                                                                                                                                                                                                                                                                                                                                                                                                                                                                                                                                                                                                                                                                                                                                                                                                                                                                                                                                                                                                                                                                                                                                                                                                                   |
| Date Submitted by the Author: | 06-May-2020                                                                                                                                                                                                                                                                                                                                                                                                                                                                                                                                                                                                                                                                                                                                                                                                                                                                                                                                                                                                                                                                                                                                                                                                                                                                                                                                |
| Complete List of Authors:     | Vivash, Lucy; Monash University, Neurosciences; Alfred Hospital, Neurology<br>Malpas, Charles; Royal Melbourne Hospital, The University of Melbourne, Department of Neurology; University of Melbourne, Medicine and Radiology<br>Churilov, Leonid; University of Melbourne, Medicine and Radiology<br>Walterfang, Mark; Royal Melbourne Hospital, Neuropsychiatry; University of Melbourne, Melbourne Neuropsychiatry<br>Brodthmann, Amy; Florey Institute for Neuroscience and Mental Health; Monash University, Eastern Cognitive Disorders Clinic<br>Piguet, Olivier; University of Sydney - Mallett Street Campus, Brain and Mind Centre; The University of Sydney, School of Psychology<br>Ahmed, Rebekah; The University of Sydney, Brain and Mind Centre; Royal Prince Alfred Hospital, Memory and Cognition Clinic<br>Bush, Ashley; The University of Melbourne, Florey Department of Neuroscience and Mental Health<br>Hovens, Chris; Royal Melbourne Hospital, Department of Surgery<br>Kalincik, T; The University of Melbourne, Medicine and Radiology<br>Darby, David; The Florey Institute of Neuroscience and Mental Health; Alfred Hospital, Neurology<br>Velakoulis, Dennis; Royal Melbourne Hospital, Neuropsychiatry; University of Melbourne, Melbourne Neuropsychiatry Centre<br>O'Brien, Terence; Monash University |
| Keywords:                     | Dementia < NEUROLOGY, Clinical trials < THERAPEUTICS, PSYCHIATRY                                                                                                                                                                                                                                                                                                                                                                                                                                                                                                                                                                                                                                                                                                                                                                                                                                                                                                                                                                                                                                                                                                                                                                                                                                                                           |
|                               |                                                                                                                                                                                                                                                                                                                                                                                                                                                                                                                                                                                                                                                                                                                                                                                                                                                                                                                                                                                                                                                                                                                                                                                                                                                                                                                                            |

SCHOLARONE™  
Manuscripts

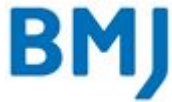

I, the Submitting Author has the right to grant and does grant on behalf of all authors of the Work (as defined in the below author licence), an exclusive licence and/or a non-exclusive licence for contributions from authors who are: i) UK Crown employees; ii) where BMJ has agreed a CC-BY licence shall apply, and/or iii) in accordance with the terms applicable for US Federal Government officers or employees acting as part of their official duties; on a worldwide, perpetual, irrevocable, royalty-free basis to BMJ Publishing Group Ltd ("BMJ") its licensees and where the relevant Journal is co-owned by BMJ to the co-owners of the Journal, to publish the Work in this journal and any other BMJ products and to exploit all rights, as set out in our [licence](#).

The Submitting Author accepts and understands that any supply made under these terms is made by BMJ to the Submitting Author unless you are acting as an employee on behalf of your employer or a postgraduate student of an affiliated institution which is paying any applicable article publishing charge ("APC") for Open Access articles. Where the Submitting Author wishes to make the Work available on an Open Access basis (and intends to pay the relevant APC), the terms of reuse of such Open Access shall be governed by a Creative Commons licence – details of these licences and which [Creative Commons](#) licence will apply to this Work are set out in our licence referred to above.

Other than as permitted in any relevant BMJ Author's Self Archiving Policies, I confirm this Work has not been accepted for publication elsewhere, is not being considered for publication elsewhere and does not duplicate material already published. I confirm all authors consent to publication of this Work and authorise the granting of this licence.

1  
2  
3 **A study protocol for a phase II randomized, double-blind, placebo-controlled trial of**  
4 **sodium selenate as a disease-modifying treatment for behavioural variant**  
5 **frontotemporal dementia**  
6  
7

8  
9 **Authors:** Lucy Vivash<sup>1,2,3,4</sup>, Charles B Malpas<sup>1,2,3,5</sup>, Leonid Churilov<sup>4</sup>, Mark Walterfang<sup>6,7</sup>,  
10 Amy Brodtmann<sup>3,8,9,10</sup>, Olivier Piguet<sup>11,12</sup>, Rebekah M Ahmed<sup>12,13</sup>, Ashley I. Bush<sup>8</sup>,  
11 Christopher M Hovens<sup>14</sup>, Tomas Kalincik<sup>3,5</sup>, David Darby<sup>1,2,3,4,8</sup>, Dennis Velakoulis<sup>6,7</sup>,  
12 Terence J. O'Brien<sup>1,2,3,4</sup>.  
13  
14

15  
16  
17 **Affiliations:**

18 <sup>1</sup> Department of Neurosciences, Central Clinical School, Monash University, Melbourne  
19 Australia

20 <sup>2</sup> Department of Neurology, Alfred Hospital, Melbourne, 3004, Australia

21 <sup>3</sup> Department of Neurology, Royal Melbourne Hospital, Parkville, 3052, Australia

22 <sup>4</sup> Department of Medicine and Radiology, The University of Melbourne, Parkville, 3052,  
23 Australia

24 <sup>5</sup> CORe, Department of Medicine, The Royal Melbourne Hospital, The University of  
25 Melbourne, Parkville, 3052, Australia

26 <sup>6</sup> Neuropsychiatry Unit, Royal Melbourne Hospital, Parkville, 3052, Australia

27 <sup>7</sup> Melbourne Neuropsychiatry Centre, University of Melbourne and North-Western Mental  
28 Health, Parkville, 3052, Australia

29 <sup>8</sup> The Florey Institute for Neuroscience and Mental Health, Melbourne, Australia

30 <sup>9</sup> Melbourne Dementia Research Centre, University of Melbourne, Australia

31 <sup>10</sup> Eastern Cognitive Disorders Clinic, Monash University, Melbourne, Australia

32 <sup>11</sup> The University of Sydney, School of Psychology, Sydney, Australia

33 <sup>12</sup> The University of Sydney, Brain & Mind Centre, Sydney, Australia

34 <sup>13</sup> Memory and Cognition Clinic, Royal Prince Alfred Hospital, Sydney, Australia

35 <sup>14</sup> Department of Surgery, Royal Melbourne Hospital, University of Melbourne  
36  
37  
38  
39  
40

41 **Author Contributions:** LV drafted the manuscript. All authors contributed to study design.  
42 All authors edited the manuscript and approved the final version.  
43  
44  
45

46 **Funding Statement:** This work is supported by the Australian National Health and Medical  
47 Research Council (NHMRC) Medical Research Future Fund grant number APP1170276. OP  
48 is supported by an NHMRC Senior Research Fellowship (GNT1103258).  
49

50 **Competing Interests Statement:** All authors report a grant from the NHMRC to support this  
51 study. The authors report the following disclosures outside of this study: LV reports personal  
52 fees from Biogen Australia. AIB reports personal fees from Collaborative Medicinal  
53 Development Pty Ltd, and shares in Alterity, Cogstate Ltd, Grunbiotics and Mesoblast Ltd.  
54 CH reports issued patents US 9,415,063 and US 8,920,951. TK reports grants from the  
55 University of Melbourne and Biogen Australia Pty Ltd; personal fees from Biogen, Roche,  
56 Genzyme-Sanofi, Merck, Novartis, WebMD Global, Teva and BioCSL; and non-financial  
57 support from Biogen, Genzyme-Sanofi and Merck. TOB reports research funding from  
58  
59  
60

1  
2  
3 Biogen, Eisai, UCB, Anavex and Praxis. CM, LC MW, AB, OP, RA, DD and DV have  
4 nothing to disclose  
5

6  
7 **Corresponding Author:** Dr Lucy Vivash  
8 Dept of Neurosciences  
9 Level 6 The Alfred Centre  
10 Monash University  
11 99 Commercial Road  
12 Melbourne, 3004  
13 Australia  
14 [lucy.vivash@monash.edu](mailto:lucy.vivash@monash.edu)  
15  
16  
17  
18  
19  
20  
21  
22  
23  
24  
25  
26  
27  
28  
29  
30  
31  
32  
33  
34  
35  
36  
37  
38  
39  
40  
41  
42  
43  
44  
45  
46  
47  
48  
49  
50  
51  
52  
53  
54  
55  
56  
57  
58  
59  
60

For peer review only

## Abstract

*Introduction:* Behavioural variant frontotemporal dementia (bvFTD) is a neurodegenerative disorder often neuropathologically associated with the accumulation of abnormally hyperphosphorylated tau, for which there is currently no disease modifying treatment. Previous work by our group has shown sodium selenate upregulates the activity of PP2A in the brain, increasing the rate of tau dephosphorylation.

*Objective:* To evaluate the efficacy and safety of sodium selenate as a disease-modifying treatment for bvFTD.

*Trial design:* A multi-site, phase 2b, double-blind, randomised placebo-controlled trial.

*Setting:* Four Australian academic hospitals that are centres of expertise for patients with bvFTD.

*Participants and intervention:* 120 participants will be enrolled in the study. Following screening, participants will be randomised (1:1) to blinded treatment with either sodium selenate (15 mg three times a day) or matching placebo.

*Main outcome measure and analysis:* The primary study outcome will be percentage brain volume change (PBVC) as measured on MRI over 52 weeks of treatment. This will be analysed with a general linear model (ANCOVA) with the PBVC as an output, the treatment as an input, and the baseline brain volume as covariate for adjustment purposes. Secondary outcomes include safety and tolerability measures, and efficacy measures; change in CSF total-tau, Addenbrooke's Cognitive Examination-III and Cambridge Behavioural Inventory-Revised scores over the 52 weeks of treatment. These will also be analysed with analysis of covariance (ANCOVA) where the corresponding baseline measure will be incorporated in the model. Additional exploratory outcomes will include other imaging, cognitive and biospecimen analyses.

*Ethics and dissemination:* The study was approved by the Human Research & Ethics Committee of the lead site as part of the Australian Multisite Ethics approval system. The results of the study will be presented at national and international conferences and published in peer-reviewed journals.

*Trial registration number:* ACTRN12620000236998

## Strengths and Limitations

- A large placebo-controlled RCT of a new drug for behavioural variant frontotemporal dementia (bvFTD)
- Extensive clinical, cognitive and imaging data will be collected producing a highly characterised prospective patient cohort which will be of huge significance to the field
- A mixture of established and novel diagnostic methods will be used, potentially validating new diagnostic approaches for future use
- Due to difficulty identifying pathology of bvFTD in life, some participants may not have the pathology targeted by this drug

## Background

Behavioural-variant frontotemporal dementia (bvFTD) is the most common clinical syndrome caused by frontotemporal lobar degeneration (FTLD). It is a neurodegenerative disease characterised by the development of progressive behavioural features including disinhibition, apathy, loss of empathy, perseveration and stereotyped behaviour. bvFTD is a devastating condition for both patients and their families, and is invariably fatal. Prevalence rates of bvFTD range from 15-50 cases per 100,000 people [1-3]. No approved disease-modifying treatments currently exist for bvFTD, and the few international clinical trials that have been carried out have been unsuccessful [4]. A major unmet need therefore exists in the treatment of this condition. Approximately 45% of bvFTD cases are classified as ‘tauopathies’, neuropathologically characterised by abnormally hyperphosphorylated inclusions of the microtubule-associated protein *tau* [5]. Hyperphosphorylated tau dissociates from microtubules and aggregates in to filamentous tau deposits, disrupting axonal structure and transport leading to neurodegeneration. Targeting this hyperphosphorylated tau is a promising treatment strategy for these patients that requires validation with randomised clinical trials [6].

### *Targeting hyperphosphorylated tau*

Two broad approaches are possible to pharmacologically reduce tau hyperphosphorylation in the brain: 1) *inhibition* of tau serine/threonine kinases, or 2) *activation* of tau serine/threonine phosphatases. Multiple kinases have been implicated in the phosphorylation of tau, hence a more feasible strategy is the upregulation of protein phosphatase 2 (PP2A), the major tau serine/threonine phosphatase present in the brain, which accounts for over 70% of phosphatase activity [7]. PP2A is co-localised with tau [8-10], and reductions in PP2A activity, and therefore reduced tau dephosphorylation are observed in many neurodegenerative diseases. Further, PP2A activity negatively correlates with tau levels in human tissue [10].

Selenium is an essential trace element in humans and is present in low concentrations in food and the environment. Whilst numerous studies have reported potential chemopreventive benefits associated with selenium dietary supplementation, the therapeutic potential of other selenium compounds has not been widely explored. A large body of pre-clinical, and emerging clinical data, have provided evidence for the potential of sodium selenate, an oxidised salt of selenium, as a disease-modifying treatment for hyperphosphorylated tau-based neurodegenerative diseases, traumatic brain injury, and epilepsy [11-21]. Our research has not only demonstrated significant therapeutic benefits in preclinical models of cancer [12], Alzheimer’s disease [13, 22], epilepsy [15, 16, 18, 21] and traumatic brain injury [11, 18, 19], but also has showed that these benefits were restricted to the administration of the single selenium species, sodium selenate, and were only beneficial in a therapeutic setting when administered in supranutritional doses [17, 23].

### *Clinical Trials of Sodium Selenate for Other Conditions*

Two clinical trials have demonstrated the safety and tolerability of sodium selenate in patients with diseases other than FTD. First, a Phase I study in patients with castration-resistant prostate cancer demonstrated a favourable safety profile of VEL015 (sodium selenate) [12]. This study demonstrated that doses up to 60mg per day were tolerable in chronic dosing, with dose-limiting toxicity observed at 90mg per day.

More recently, our group completed and published a Phase IIa trial of sodium selenate (30mg/day) in 40 patients with mild-moderate Alzheimer’s disease (AD), which confirmed the safety and tolerability of the agent [17, 23]. This AD study was designed to evaluate

1  
2  
3 safety and tolerability and not treatment efficacy, however MR diffusion tensor imaging  
4 (DTI) measures were exploratory outcome measures in this study. Voxel-wise analysis of  
5 DTI metrics showed relatively less degeneration in the treatment group compared to placebo,  
6 which was widespread, but most prominent in the corpus callosum [17]. Selenium levels in  
7 patients' serum and CSF were higher in the treatment group, which is evidence of penetration  
8 of the agent across the blood-brain barrier and into the CNS [23]. In addition, selenium levels  
9 were inversely correlated with the degree of decline in cognitive measures over the 6-month  
10 treatment period, indicating a relationship between drug exposure and neuroprotective  
11 efficacy [23].  
12  
13

### 14 15 *Phase 1 Open-label Trial of Sodium Selenate for bvFTD*

16  
17 We are currently undertaking a single site, exploratory, Phase Ib open labelled study of sodium  
18 selenate as a treatment for patients with bvFTD (ACTRN12617001218381,  
19 <https://anzctr.org.au>). The primary objective is to assess the safety and tolerability of a  
20 supranutritional dose of sodium selenate in patients with possible bvFTD. Twelve patients have  
21 been recruited, and eight patients have completed the 12-month treatment phase so far. There  
22 have been no withdrawals, and adverse effects have been relatively mild and similar to those  
23 experienced in the Phase IIa AD trial [17].  
24

25  
26 Informed by this experience, we will now conduct a multi-centred placebo-controlled  
27 randomised controlled trial of sodium selenate as a treatment for bvFTD.  
28

### 29 **Aims/Outcomes**

30  
31 The aim of this study is to investigate the efficacy and safety of sodium selenate (15 mg,  
32 three times a day) as a disease-modifying treatment of probable bvFTD.  
33

34 The primary outcome variable is change in whole brain volume over 52 weeks of treatment.

35 The secondary outcome variables (safety) will be rate and severity of adverse events and rate  
36 of study withdrawal. Secondary efficacy outcome variables are change in cerebrospinal fluid  
37 (CSF) total-tau, change in cognition as measured by the Addenbrooke's Cognitive  
38 Examination-III (ACE-III) total score and change in behaviour as measured by the  
39 Cambridge Behavioural Inventory-Revised (CBI) total score over 52 weeks.  
40

41 Additional exploratory outcomes will investigate changes in CSF, serum and plasma protein  
42 biomarkers (total-tau, phospho-tau and neurofilament light chain (NfL)), changes in other  
43 measures of cognition and behaviour (memory, language, executive function, attention), and  
44 changes in additional neuroimaging measures, including cortical thickness, volumetrics,  
45 advanced MRI (diffusion, quantitative susceptibility mapping (QSM), resting state) and  
46 fluoro-deoxy glucose (FDG) and tau-binding positron emission tomography (PET). The study  
47 will also use advanced statistical modelling to identify predictors of treatment response and  
48 non-response, and correlations between biomarkers and cognitive function and behaviour.  
49  
50

### 51 **Methods/Design**

52  
53 This is a multi-site, phase 2b double-blind, randomised, placebo-controlled trial of sodium  
54 selenate as a treatment for probable bvFTD. Patients will receive 52 weeks of treatment with  
55 either sodium selenate (15 mg tds) or placebo. 120 patients will be recruited in to this study.  
56 The study will be conducted at 4 centres in Melbourne and Sydney. The study is funded by  
57 the Australian National Health and Medical Research Council (NHMRC; APP1170276).  
58  
59  
60



Ethics approval was granted by the Alfred Health Human Research Ethics Committee, Melbourne (609/19). The trial is registered with ANZCTR (ACTRN12620000236998)

### *Eligibility Criteria*

Inclusion criteria: Participants will be aged over 35, have a diagnosis of probable bvFTD [24] and a modified Hachinski score  $<5$  [25]. Participants must be using effective contraception for the duration of the trial. Participants must have a lumbar puncture and MRI performed during screening. The structural brain MRI must be consistent with a bvFTD diagnosis with no other gross structural abnormalities indicating another neurological disorder. The participant must have a negative amyloid-PET scan (either as part of screening assessments or historical). The participant must live in the community and have at least 10 contact hours per week with a responsible carer. The carer should be capable of ensuring the participant's compliance with the medication and study, and complete questionnaires about the participant's behaviour throughout the study. Written informed consent must be obtained from the participant or their legally authorised representative (as required by local laws and regulations), and the participant's carer.

Exclusion Criteria: Participants will be excluded based on; history of substance use disorder (including alcohol and cannabis); previous participation in an interventional clinical trial (within 3 months of screening), with the exception of prior exposure to sodium selenate; known sensitivity to selenium, sodium selenate, any medicine or vitamin containing sodium selenate, similar agents or any of the excipients (including microcrystalline cellulose) used; known history of familial Alzheimer's disease or genetic form of FTD that is not considered a primary tauopathy (e.g., *GRN* mutation or *C9ORF72* expansion); lifelong primary psychiatric disorder; significant traumatic brain injury with loss of consciousness  $>5$  mins; significant medical or neurological disease, with the exception of bvFTD that is not adequately controlled by therapy and may interfere with the patient's ability to complete the study or affect the patient's cognitive performance; contraindication to MRI or LP; significant impairment of renal, hepatic or haematological function; participant is or has (within 6 weeks of the screening visit) taken any of the following: NMDA receptor antagonists, oral and/or injectable steroids, digoxin, phenobarbitone or warfarin; commencement or titration of other medications known to have an effect on mood or cognition within the 4 weeks prior to screening, including anticholinergics, hypnotics, sedatives, anxiolytics, antidepressants, antiepileptics, antipsychotics, memory-enhancing drugs, nutraceuticals, and other supplements which contain selenium.

### *Intervention, Randomisation and Blinding*

Each participant will be provided a unique screening number upon signing the consent form. Once all screening assessments have been completed and the participant is eligible to continue, the participant will be assigned a sequential randomisation number generated within the redcap eCRF (subject to entry of key data into the eCRF). This randomisation number will be provided to the unblinded site pharmacist who will dispense the drug/placebo in accordance with the randomisation schedule.

Participants will receive either sodium selenate or placebo (1:1) for 52 weeks. Each capsule will contain 5 mg of drug or placebo. The initial dose will be two capsules (10 mg) three times a day (tds), increasing to three capsules (15mg) tds at week 4, subject to tolerability. In the event of adverse events potentially related to the study drug administration, treatment may be temporarily interrupted and a single within-subject dose reduction, to 10 mg tds will,

1  
2  
3 at the investigator's discretion, be allowed. An additional down-titration to 5 mg tds will only  
4 be allowed after consultation with the medical monitor.  
5

6 The study participant, their study partner and all site staff (with the exception of the pharmacy  
7 team) will remain blinded throughout the course of the study. Individual unblinding envelopes  
8 for emergency unblinding of individual patients will be kept at the study sites. The data safety  
9 monitoring board (DSMB) will also be blind to study treatment when reviewing safety data. In  
10 the event of unexpected adverse events the DSMB may request unblinding of data to assess  
11 potential causality.  
12

### 13 *Procedures and Assessments*

14  
15 Participants will undergo study testing and procedures as outlined in Table 1. Briefly, at the  
16 screening assessment, the participant will be reviewed to ensure they meet all the inclusion  
17 criteria and none of the exclusion criteria. Neuroimaging (MRI, and amyloid-PET) will  
18 follow to strengthen the bvFTD diagnosis (and exclude Alzheimer's disease). At the baseline  
19 visit, the inclusion and exclusion criteria will be reviewed to ensure the participant remains  
20 eligible for the study. The participant will undergo an FDG-PET, baseline CSF sampling and  
21 a cognitive and behavioural assessment. Lastly the participant will be administered the study  
22 drug (10mg) in the clinic and multiple blood draws taken for pharmacokinetic analysis.  
23

24  
25 Follow-up phone calls will be made to monitor for adverse events. If participants are  
26 tolerating the study drug, they will be instructed to increase to 3 capsules (15mg tds) at week  
27 4. Diary cards will be given to participants to record adverse events that occur between clinic  
28 visits.  
29

30 Participants will attend regular in-clinic study visits to assess their safety and well-being, and  
31 to resupply the study medication. The cognitive and behavioural assessment will be repeated  
32 at weeks 26 and 52. Prior to their week 52 clinical visit participants will undergo repeat  
33 neuroimaging (MRI, FDG-PET) and CSF sampling for biomarker analyses. Participants will  
34 attend a final safety follow up visit 4 weeks following the cessation of the study drug.  
35  
36  
37

### 38 *Measures*

#### 39 *Neuroimaging*

40  
41 MRIs will be acquired during the screening period and week 52. The MRI protocol includes  
42 the following sequences; volumetric T1 (1mm<sup>3</sup>), T2-space (0.8 x 1.1 x 4mm), volumetric T1  
43 (1mm<sup>3</sup>), multi-band DWI (2.5mm<sup>3</sup>), resting state fMRI (4.5mm<sup>3</sup>), multi-echo QSM  
44 (3.5mm<sup>3</sup>).  
45

46  
47 The primary outcome measure will be the change in whole-brain volume (percentage brain  
48 volume change; PBVC) from baseline to 52 weeks. Whole-brain volume will be measured  
49 using T1-weighted structural MRI acquired at baseline and after 52 weeks of treatment.  
50 Change in whole-brain volume will be computed using the *SIENA* module within the FSL  
51 software [26]. Briefly, *SIENA* performs brain extraction, halfway-space registration, and  
52 tissue segmentation. Perpendicular edge displacement is then computed between the  
53 brain/non-brain edge points of the two images. The accuracy of this method is very high, with  
54 longitudinal error reported at 0.15% [27].  
55

56  
57 Florbetaben PET will be conducted at screening to exclude Alzheimer's disease. 300MBq  
58 ( $\pm 10\%$ ) will be injected intravenously, 90 minutes post-injection a dynamic 3D scan (4x300  
59 sec frames) will be acquired. This will not be required for participants who have a historical  
60 negative amyloid PET that is available for review by the site principal investigator.

1  
2  
3 FDG PET will be conducted at baseline and week 52 to assess disease progression. 185 MBq  
4 ( $\pm 10\%$ ) will be injected intravenously, the patient will rest in a quiet room for 20 minutes,  
5 and a dynamic 3D acquisition will begin 30 minutes post-injection (6x300sec frames).  
6 An optional sub-study investigating tau PET as a marker of disease progression will also be  
7 conducted. Participants who consent will have two tau PET scans, at baseline and in the two  
8 weeks prior to week 52. A dynamic 3D acquisition (12x150 s frames) will begin 45 minutes  
9 after the intravenous injection of 185MBq ( $\pm 10\%$ ) of PI-2620.  
10  
11

### 12 Cognitive and Behavioural Battery

13 The following cognitive and behavioural scales will be administered at baseline, week 26 and  
14 week 52 of the study.  
15  
16

17  
18 *Addenbrooke's Cognitive Examination III:* The Addenbrooke's Cognitive Examination is a  
19 broad cognitive screening test of 5 cognitive domains; attention/orientation, memory,  
20 language, verbal fluency and visuospatial skills, producing a score out of 100 (normal scores  
21  $\geq 88/100$ ). Administration takes about 15 minutes and three different versions are available  
22 [28]. This will be analysed as one of the secondary efficacy endpoints.  
23

24  
25 *NIH Toolbox:* The NIH Toolbox is a multidimensional battery of measures used to assess  
26 cognitive, sensory, motor and emotional function in people. The NIH Toolbox has been  
27 validated for ages 3-85 years and is designed such that repeated assessments can be completed  
28 for longitudinal monitoring of disease progression. The NIH Toolbox takes approximately 30  
29 minutes to administer [29, 30].  
30

31  
32 *Hayling Sentence Test:* The Hayling Sentence Completion test is a measure of response  
33 initiation and response suppression. It is entirely verbal, and therefore can be administered to  
34 patients with problems with reading and visual perception. It consists of two sets of 15  
35 sentences each having the last word missing. In the first section the examiner reads each  
36 sentence aloud and the participant has to simply complete the sentences as quickly as possible,  
37 yielding a simple measure of response initiation speed. The second part of the Hayling requires  
38 participants to complete a sentence with a nonsense ending word, giving measures of response  
39 suppression ability and thinking time. It takes approximately 5 minutes to administer and yields  
40 three different measures of executive functioning which can be considered separately or  
41 combined into an overall score [30].  
42

43  
44 *Victoria Stroop Test:* The Victoria Stroop Test is a measure of executive function commonly  
45 used in neuropsychological evaluation. The test uses three conditions that consist in naming  
46 the color of dots, of neutral words, and of color words printed in incongruent colors. Each  
47 condition contains 24 items. Because of its short administration time, approximately 5 minutes,  
48 it is appropriate for use in geriatric populations and with those suffering from dementia [31].  
49

50  
51 *Controlled Oral Word Association Test (COWAT):* Controlled Oral Word Association Test, is  
52 a verbal fluency test that measures executive function. The participant is asked to name words  
53 beginning with a designated letter for one minute under certain conditions (e.g., no repetitions,  
54 no proper nouns, no identical stem words) and this procedure is repeated with three different  
55 letters. The whole examination usually takes 5–10 minutes [32].  
56

57  
58 *Trail Making Test A and B:* The Trail Making Test is a test of visual attention and task  
59 switching. It consists of two parts in which the subject is instructed to connect a set of 25 targets  
60 as quickly as possible while still maintaining accuracy. There are two parts to the test: in the

1  
2  
3 first, the targets are all numbers (1, 2, 3, etc.) which the participant must connect sequentially;  
4 in the second part, the subject alternates between numbers and letters (1, A, 2, B, etc.). The  
5 first part of the test is used to primarily measure processing speed, whilst the second part is a  
6 test of executive function. The time to complete the paths are the scores for this assessment  
7 [33].  
8  
9

10 *Digit Span:* The digit span test is a measure of attention and working memory. Participants are  
11 told a sequence of digits (which become progressively longer) which they must repeat back to  
12 the examiner. This test is performed forwards and backwards. The score is the maximum length  
13 of digits they correctly repeated under the two conditions [34].  
14

15 *Sydney Language Battery:* The Sydney Language Battery is a test of language at a single word  
16 level, which measures naming, repetition, comprehension, and semantic association. The same  
17 set of 30 multisyllabic nouns (3 or more syllables) are used across the four tasks. Words are  
18 ordered with decreasing frequency and are graded into three broad levels of difficulty [35].  
19  
20

21 *Mini Social Emotional Assessment (mini-SEA):* The Mini Social Emotional Assessment (mini-  
22 SEA) is a cognitive battery designed to assess social and emotional function. The battery  
23 contains two components: (a) a faux-pas test assessing theory of mind, and (b) a facial  
24 emotional recognition test. The neural correlates of the mini-SEA have been established in  
25 bvFTD, with significant relationships reported with the medial prefrontal cortex (mPFC). The  
26 mini-SEA takes approximately 30 minutes to administer [36].  
27  
28

29 *Cambridge Behavioural Inventory - Revised:* The Cambridge Behavioural Inventory – Revised  
30 (CBI-R) is an informant questionnaire that assesses neuropsychiatric and neurobehavioral  
31 symptoms in patients with neurodegenerative disease [18]. The instrument contains 45  
32 questions assessing the following domains: (a) memory and orientation, (b) everyday skills, (c)  
33 self-care, (d) abnormal behaviour, (e) mood, (f) beliefs, (g) eating habits, (h) sleep, (i)  
34 stereotypic and motor behaviours, and (j) motivation. The instrument takes approximately 10  
35 minutes to complete. A total score is generated that will be used for this study [37]. This will  
36 be analysed as one of the secondary efficacy endpoints.  
37  
38

39 *Caregiver Burden Scale:* The Caregiver Burden Scale (CBS) is a caregiver-completed  
40 instrument that assesses the experience of burden in people who care for those with cognitive  
41 disorders [38]. The instrument contains 22 questions and takes approximately 5 minutes to  
42 complete. A total score is generated that will be used for the present study [38].  
43  
44  
45

## 46 Safety Assessments

47 A 12-ECG and a physical examination will be performed at each clinic visit, haematology,  
48 chemistry and urinalysis will be performed at each clinic visit except week 16. Neurological  
49 examinations will be carried out at screening, baseline, week 26 and 52. Any clinically  
50 significant abnormalities in any of these investigations will be considered adverse events. The  
51 diary cards will be reviewed to ascertain any adverse events that occurred between visits, and  
52 the participant and their study partner interviewed to confirm adverse events and concomitant  
53 therapies.  
54  
55

## 56 Blood biomarkers

57 Additional blood samples will be collected for pharmacokinetic, biomarker and exploratory  
58 analyses. Pharmacokinetic sampling (6ml/sample) will be performed at baseline, week 8 and  
59  
60

1  
2  
3 week 52. A pre-dose (1 hour) sample will be taken, then 4 additional samples, 0.5, 1, 2, 4  
4 hours after dosing. Sodium selenate levels in plasma will subsequently be measured in these  
5 samples for determination of the pharmacokinetic profile.  
6

7 Exploratory sampling will occur at baseline, week 8, week 26 and week 52. Samples will be  
8 taken for plasma, serum and PMBC isolation at each of these visits. Blood for DNA and  
9 RNA will be taken only at baseline. Exploratory analyses will include measurement of  
10 proteins associated with neurodegeneration (total-tau, phospho-tau, beta-amyloid<sub>42</sub>,  
11 neurofilament light) in serum and plasma, testing for genetic mutations associated with  
12 bvFTD (*MAPT*, *GRN*, *C9ORF72* expansion). As yet undetermined additional testing may be  
13 performed.  
14  
15

### 16 CSF biomarkers

17 CSF sampling will take place at baseline (pre-treatment) and week 52. Samples will be  
18 analysed for beta-amyloid<sub>42</sub>, total-tau, phospho-tau and NfL protein levels. Additional as yet  
19 undetermined testing may also be performed. Change in total-tau will be used as a secondary  
20 efficacy outcome measure.  
21  
22

### 23 *Power and Sample Size*

24 All outcomes are predefined prospectively in hierarchical order, meaning that the trial will be  
25 declared positive or negative based on primary outcome. Statistical power has thus been  
26 determined on the primary outcome variable (PBVC). Previous studies indicate that the mean  
27 annual rate of PBVC in FTD is 3.15% ( $SD = 2.08$ )[39]. The mean atrophy rate in controls is  
28 0.47%. Slowing the rate of atrophy by 50% (half-way between the FTD rate and the control  
29 rate = 1.81%) would represent a clinically meaningful treatment effect. Assuming the  
30 standard deviation of the FTD group holds across treatment and placebo arms, this would  
31 correspond to a medium effect size (Cohen's  $d = 0.64$ ). Given a critical two-tailed alpha of  
32 0.05, recruiting 80 participants (randomised 1:1 into two groups) would yield power of 0.80,  
33 to observe such or larger difference. Participant attrition rates are high (10-40%) in similar  
34 trials in FTDs [40-43], therefore a sample size of 120 will allow for adequate power. Given  
35 the previously demonstrated safety and tolerability, no interim analyses of efficacy, futility or  
36 safety are planned.  
37  
38  
39  
40  
41

### 42 *Outcomes and statistical overview*

#### 43 Primary endpoint

44 The primary outcome measure will be the PBVC from baseline to 52 weeks between the  
45 treatment and placebo groups. All participants with a post-baseline MRI will be included in the  
46 primary analysis. This will be analysed with a general linear model (ANCOVA) with the PBVC  
47 as an output, the treatment as an input, and the baseline brain volume as covariate for  
48 adjustment purposes.  
49  
50  
51

#### 52 Secondary endpoints

53 All continuous secondary efficacy endpoints will be reported using descriptive statistics (mean,  
54 median, minimum, maximum, standard deviation) by visit. Transformations of these endpoints  
55 (such as change and percentage change) will be summarised similarly.  
56

57 The analysis of change from Baseline to Week 52 in CSF total-tau, ACE-III and CBI-R will  
58 be performed using a general linear model (ANCOVA) where the corresponding baseline  
59  
60

1  
2  
3 measure will be incorporated as a covariate in the model. Estimates will be obtained from the  
4 model of the adjusted mean change (with 95% confidence limits) in marker for treatment.  
5

### 6 Safety and tolerability

7  
8 For all categorical outcomes frequency tables (number of subjects and percentage) will be  
9 presented by visit, these tables will indicate both the number of subjects in the cohort (N) and  
10 the number of observations (n).

11 Safety and tolerability will be determined by frequency of adverse events (CTCAE score  $\geq 3$ ),  
12 frequency of down-titration events and frequency of study discontinuation.  
13  
14  
15

### 16 *Monitoring and Data Quality*

17  
18 In accordance with GCP and ICH guidelines, the project manager will carry out source  
19 document verification at regular intervals to ensure that the data collected in the eCRF are  
20 accurate and reliable. The frequency of monitoring visits will be determined by the rate of  
21 subject recruitment.  
22

23 An independent medical monitor has been appointed to provide safety oversight during the  
24 conduct of the study, and to review all safety-related events at three-month intervals.  
25

26 The DSMB will consist of the medical monitor, an independent clinician and independent  
27 biostatistician. The first DSMB review will be conducted within two weeks of the third  
28 randomised patient reaching their week 8 visit or within one week of two SAEs occurring,  
29 whichever is first. Subsequent DSMB reviews will occur every six months. Additional DSMB  
30 meetings may be called at the request of the medical monitor or site principal investigators in  
31 the event of urgent safety concerns. After each review the medical monitor will make  
32 recommendations to the principal investigator based on the safety and tolerability issues.  
33  
34

### 35 *Ethics and Dissemination*

36  
37 The study has been approved by the Alfred Hospital Human Research Ethics Committee  
38 (HREC, 609/19). Results of this study will be disseminated through presentations at national  
39 and international conferences and published in peer-reviewed journals. Any amendments to the  
40 protocol will be approved by the HREC prior to implementation and subsequently updated on  
41 ANZCTR.  
42  
43

### 44 *Patient and Public Involvement Statement*

45  
46 Patients were not involved in the study conception or design. All study participants will be  
47 provided with a plain English summary of the results of the study at its conclusion (a  
48 requirement of Australian ethics committees and stated in the study consent form).  
49 Dissemination of results to the wider community will be through open events at our hospitals  
50 and Dementia Australia as well as media reports.  
51  
52

### 53 **Conclusions**

54  
55 To date there have been few clinical trials in bvFTD, with such trials complicated by different  
56 underlying pathologies such as hyperphosphorylated tau and TDP43. This study represents the  
57 first to target hyperphosphorylated tau pathology, which accounts for approximately 50% of  
58 cases. Sodium selenate has been shown to activate PP2A, increasing dephosphorylation of  
59 hyperphosphorylated tau. Therefore, this double blind randomised controlled trial will  
60

1  
2  
3 investigate sodium selenate as a potential disease-modifying treatment for bvFTD. The main  
4 outcome will be efficacy of sodium selenate as measured by PBVC over 52 weeks of treatment.  
5 In addition to testing a potential new treatment for bvFTD, the study will also generate  
6 considerable longitudinal multimodal data which will lead to a greater understanding of disease  
7 progression and potentially identify new biomarkers of treatment response that can be used in  
8 future clinical trials in bvFTD. The statistical modelling of factors influencing treatment (non-  
9 )response will enable a “precision medicine” approach for the future development of sodium  
10 selenate as a treatment. This will allow the identification of patients most likely to respond to  
11 the treatment, increasing the chances of success of future studies, whilst minimising the  
12 resources needed to continue development and avoiding treating patients who will not benefit  
13 from the treatment.  
14  
15  
16  
17  
18  
19  
20  
21  
22  
23  
24  
25  
26  
27  
28  
29  
30  
31  
32  
33  
34  
35  
36  
37  
38  
39  
40  
41  
42  
43  
44  
45  
46  
47  
48  
49  
50  
51  
52  
53  
54  
55  
56  
57  
58  
59  
60

For peer review only

**Table 1: Schedule of Assessments**

| Visit #                                            | Screening |    | Baseline |    | TC1 | TC2 | TC3 | 3 | 4  | 5  | 6  | 7  | 8  |
|----------------------------------------------------|-----------|----|----------|----|-----|-----|-----|---|----|----|----|----|----|
|                                                    | 1a        | 1b | 2a       | 2b |     |     |     |   |    |    |    |    |    |
| Week                                               | -8 to 0   |    | -2       | 0  | 2   | 4   | 6   | 8 | 16 | 26 | 39 | 52 | 56 |
| Written informed consent                           | X         |    |          |    |     |     |     |   |    |    |    |    |    |
| Assess eligibility                                 | X         |    |          |    |     |     |     |   |    |    |    |    |    |
| Confirmation of eligibility                        |           |    |          | X  |     |     |     |   |    |    |    |    |    |
| Medical history                                    | X         |    |          |    |     |     |     |   |    |    |    |    |    |
| Confirmation of Dx of bvFTD                        | X         |    |          |    |     |     |     |   |    |    |    |    |    |
| MRI scan                                           | X         |    |          |    |     |     |     |   |    |    |    | X  |    |
| Amyloid PET scan                                   |           | X  |          |    |     |     |     |   |    |    |    |    |    |
| FDG PET scan                                       |           |    | X        |    |     |     |     |   |    |    |    | X  |    |
| tau PET scan (optional)                            |           |    | X        |    |     |     |     |   |    |    |    | X  |    |
| Lumbar puncture                                    |           |    | X        |    |     |     |     |   |    |    |    | X  |    |
| Physical examination                               | X         |    |          | X  |     |     |     | X | X  | X  | X  | X  | X  |
| Vital signs                                        | X         |    |          | X  |     |     |     | X | X  | X  | X  | X  | X  |
| 12-Lead ECG                                        | X         |    |          | X  |     |     |     | X | X  | X  | X  | X  | X  |
| Neurological exam                                  | X         |    |          | X  |     |     |     |   |    | X  |    | X  |    |
| Modified HIS                                       | X         |    |          |    |     |     |     |   |    |    |    |    |    |
| ACE                                                | X         |    |          | X  |     |     |     |   |    | X  |    | X  |    |
| Cognitive and Behavioural Battery                  |           |    |          | X  |     |     |     |   |    | X  |    | X  |    |
| C-SSRS                                             | X         |    |          | X  |     |     |     | X | X  | X  | X  | X  | X  |
| Haematology and Biochemistry                       | X         |    |          | X  |     |     |     | X |    | X  | X  | X  | X  |
| Coagulation                                        | X         |    |          |    |     |     |     |   |    |    | X  |    |    |
| Blood collected for future exploratory assessments |           |    | X        |    |     |     |     | X |    | X  |    | X  |    |
| Blood collected for pharmacokinetic analysis       |           |    |          | X  |     |     |     | X |    |    |    | X  |    |
| Urinalysis (dipstick)                              | X         |    |          | X  |     |     |     | X |    | X  | X  | X  | X  |
| Plasma HCG pregnancy test                          | X         |    |          |    |     |     |     |   |    |    |    |    |    |
| Urine pregnancy test                               |           |    |          | X  |     |     |     | X | X  | X  | X  | X  | X  |
| Dispense IP                                        |           |    |          | X  |     |     |     |   | X  | X  | X  |    |    |
| Redispense IP                                      |           |    |          |    |     |     |     | X |    |    |    |    |    |
| IMP Administration                                 |           |    |          | X  |     |     |     | X |    |    |    |    |    |
| Dispense Diary Card                                |           |    |          | X  |     |     |     | X | X  | X  | X  | X  |    |
| Review Diary Card                                  |           |    |          |    | X   | X   | X   | X | X  | X  | X  | X  | X  |
| Review of AEs/SAEs                                 |           |    |          | X  | X   | X   | X   | X | X  | X  | X  | X  | X  |
| Review of concomitant medications.                 | X         |    |          | X  | X   | X   | X   | X | X  | X  | X  | X  | X  |



1. Kettle M, et al. *Module 1: What is frontotemporal dementia? Frontotemporal Dementia Toolkit*. 2011; 1-24]. Available from: [ecdc.org.au/\\_literature\\_64153/What\\_is\\_FTD](http://ecdc.org.au/_literature_64153/What_is_FTD).
2. Coyle-Gilchrist, I.T., et al., *Prevalence, characteristics, and survival of frontotemporal lobar degeneration syndromes*. *Neurology*, 2016. **86**(18): p. 1736-43.
3. Ratnavalli, E., et al., *The prevalence of frontotemporal dementia*. *Neurology*, 2002. **58**(11): p. 1615-21.
4. Piguet, O., F. Kumfor, and J. Hodges, *Diagnosing, monitoring and managing behavioural variant frontotemporal dementia*. *Med J Aust*, 2017. **207**(7): p. 303-308.
5. Chare, L., et al., *New criteria for frontotemporal dementia syndromes: clinical and pathological diagnostic implications*. *Journal of Neurology, Neurosurgery & Psychiatry*, 2014. **85**(8): p. 865-870.
6. Hanger, D.P., B.H. Anderton, and W. Noble, *Tau phosphorylation: the therapeutic challenge for neurodegenerative disease*. *Trends in molecular medicine*, 2009. **15**(3): p. 112-119.
7. Goedert, M., et al., *Protein Phosphatase 2A Is the Major Enzyme in Brain that Dephosphorylates  $\tau$  Protein Phosphorylated by Proline-Directed Protein Kinases or Cyclic AMP-Dependent Protein Kinase*. *Journal of neurochemistry*, 1995. **65**(6): p. 2804-2807.
8. Arnold, S.E., et al., *The topographical and neuroanatomical distribution of neurofibrillary tangles and neuritic plaques in the cerebral cortex of patients with Alzheimer's disease*. *Cerebral cortex*, 1991. **1**(1): p. 103-116.
9. Hyman, B.T., et al., *Alzheimer's disease: cell-specific pathology isolates the hippocampal formation*. *Science*, 1984. **225**: p. 1168-1171.
10. Gong, C.-X., et al., *Phosphorylation of microtubule-associated protein tau is regulated by protein phosphatase 2A in mammalian brain implications for neurofibrillary degeneration in Alzheimer's disease*. *Journal of Biological Chemistry*, 2000. **275**(8): p. 5535-5544.
11. Brady, R., et al., *Sodium selenate treatment mitigates reduction of bone volume following traumatic brain injury in rats*. *Journal of musculoskeletal & neuronal interactions*, 2016. **16**(4): p. 369.
12. Corcoran, N., et al., *Open-label, phase I dose-escalation study of sodium selenate, a novel activator of PP2A, in patients with castration-resistant prostate cancer*. *British journal of cancer*, 2010. **103**(4): p. 462-468.
13. Corcoran, N.M., et al., *Sodium selenate specifically activates PP2A phosphatase, dephosphorylates tau and reverses memory deficits in an Alzheimer's disease model*. *Journal of Clinical Neuroscience*, 2010. **17**(8): p. 1025-1033.
14. Iqbal, K., et al., *Tau pathology in Alzheimer disease and other tauopathies*. *Biochimica et Biophysica Acta (BBA)-Molecular Basis of Disease*, 2005. **1739**(2): p. 198-210.
15. Jones, N.C., et al., *Targeting hyperphosphorylated tau with sodium selenate suppresses seizures in rodent models*. *Neurobiology of disease*, 2012. **45**(3): p. 897-901.
16. Liu, S.J., et al., *Sodium selenate retards epileptogenesis in acquired epilepsy models reversing changes in protein phosphatase 2A and hyperphosphorylated tau*. *Brain*, 2016. **139**(Pt 7): p. 1919-38.
17. Malpas, C.B., et al., *A Phase IIa Randomized Control Trial of VEL015 (Sodium Selenate) in Mild-Moderate Alzheimer's Disease*. *Journal of Alzheimer's Disease*, 2016(Preprint): p. 1-10.

18. Shultz, S.R., et al., *Sodium selenate reduces hyperphosphorylated tau and improves outcomes after traumatic brain injury*. *Brain*, 2015: p. awv053.
19. Tan, X.L., et al., *Sodium selenate, a protein phosphatase 2A activator, mitigates hyperphosphorylated tau and improves repeated mild traumatic brain injury outcomes*. *Neuropharmacology*, 2016. **108**: p. 382-393.
20. Whitehouse, P.J., et al., *Alzheimer's disease and senile dementia: loss of neurons in the basal forebrain*. *Science*, 1982. **215**(4537): p. 1237-1239.
21. Zheng, P., et al., *Hyperphosphorylated tau is implicated in acquired epilepsy and neuropsychiatric comorbidities*. *Molecular neurobiology*, 2014. **49**(3): p. 1532-1539.
22. van Eersel, J., et al., *Sodium selenate mitigates tau pathology, neurodegeneration, and functional deficits in Alzheimer's disease models*. *Proceedings of the National Academy of Sciences*, 2010. **107**(31): p. 13888-13893.
23. Cardoso, B.R., et al., *Supranutritional Sodium Selenate Supplementation Delivers Selenium to the Central Nervous System: Results from a Randomized Controlled Pilot Trial in Alzheimer's Disease*. *Neurotherapeutics*, 2019. **16**(1): p. 192-202.
24. Rascovsky, K., et al., *Sensitivity of revised diagnostic criteria for the behavioural variant of frontotemporal dementia*. *Brain*, 2011. **134**(9): p. 2456-2477.
25. Moroney, J.T., et al., *Meta-analysis of the Hachinski Ischemic Score in pathologically verified dementias*. *Neurology*, 1997. **49**(4): p. 1096-105.
26. Smith, S.M., et al., *Normalized accurate measurement of longitudinal brain change*. *Journal of computer assisted tomography*, 2001. **25**(3): p. 466-475.
27. Smith, S.M., et al., *Accurate, robust, and automated longitudinal and cross-sectional brain change analysis*. *Neuroimage*, 2002. **17**(1): p. 479-489.
28. Hsieh, S., et al., *Validation of the Addenbrooke's Cognitive Examination III in frontotemporal dementia and Alzheimer's disease*. *Dement Geriatr Cogn Disord*, 2013. **36**(3-4): p. 242-50.
29. Kramer, J.H., et al., *NIH EXAMINER: conceptualization and development of an executive function battery*. *Journal of the international neuropsychological society*, 2014. **20**(01): p. 11-19.
30. Burgess, P.a.S., T., *Hayling and Brixton Tests*. 1997: Pearson.
31. Spreen, O., Strauss, E., *A compendium of neuropsychological tests: Administration, norms and commentary*. 2nd ed. 1998, New York: Oxford University Press.
32. Benton, A.L., & Hamsher, K. deS., *Multilingual Aphasia Examination: Mnaul of Instruction*. 1976, Iowa City: University of Iowa.
33. Tombaugh, T.N., *Trail Making Test A and B: normative data stratified by age and education*. *Arch Clin Neuropsychol*, 2004. **19**(2): p. 203-14.
34. Wechsler, D., *Wechsler adult intelligence scale-Fourth Edition (WAIS-IV)*. Vol. 22. 2008, San Antonio, TX: NCS Pearson.
35. Savage, S., et al., *Distinguishing subtypes in primary progressive aphasia: application of the Sydney language battery*. *Dement Geriatr Cogn Disord*, 2013. **35**(3-4): p. 208-18.
36. Bertoux, M., et al., *Social Cognition and Emotional Assessment differentiates frontotemporal dementia from depression*. *J Neurol Neurosurg Psychiatry*, 2012. **83**(4): p. 411-6.
37. Wear, H.J., et al., *The Cambridge behavioural inventory revised*. *Dementia & Neuropsychologia*, 2008. **2**(2): p. 102-107.
38. Zarit, S.H., K.E. Reever, and J. Bach-Peterson, *Relatives of the impaired elderly: correlates of feelings of burden*. *The gerontologist*, 1980. **20**(6): p. 649-655.
39. Chan, D., et al., *Rates of global and regional cerebral atrophy in AD and frontotemporal dementia*. *Neurology*, 2001. **57**(10): p. 1756-63.

- 1  
2  
3 40. Boxer, A.L., et al., *Memantine in patients with frontotemporal lobar degeneration: a*  
4 *multicentre, randomised, double-blind, placebo-controlled trial*. *Lancet Neurol*, 2013.  
5 **12**(2): p. 149-56.  
6  
7 41. Boxer, A.L., et al., *An open-label study of memantine treatment in 3 subtypes of*  
8 *frontotemporal lobar degeneration*. *Alzheimer Dis Assoc Disord*, 2009. **23**(3): p. 211-  
9 7.  
10 42. Deakin, J.B., et al., *Paroxetine does not improve symptoms and impairs cognition in*  
11 *frontotemporal dementia: a double-blind randomized controlled trial*.  
12 *Psychopharmacology (Berl)*, 2004. **172**(4): p. 400-8.  
13  
14 43. Lebert, F., et al., *Frontotemporal dementia: a randomised, controlled trial with*  
15 *trazodone*. *Dement Geriatr Cogn Disord*, 2004. **17**(4): p. 355-9.  
16  
17  
18  
19  
20  
21  
22  
23  
24  
25  
26  
27  
28  
29  
30  
31  
32  
33  
34  
35  
36  
37  
38  
39  
40  
41  
42  
43  
44  
45  
46  
47  
48  
49  
50  
51  
52  
53  
54  
55  
56  
57  
58  
59  
60

For peer review only

# BMJ Open

## A study protocol for a phase II randomised, double-blind, placebo-controlled trial of sodium selenate as a disease-modifying treatment for behavioural variant frontotemporal dementia

|                                 |                                                                                                                                                                                                                                                                                                                                                                                                                                                                                                                                                                                                                                                                                                                                                                                                                                                                                                                                                                                                                                                                                                                                                                                                                                                                                                                                                                               |
|---------------------------------|-------------------------------------------------------------------------------------------------------------------------------------------------------------------------------------------------------------------------------------------------------------------------------------------------------------------------------------------------------------------------------------------------------------------------------------------------------------------------------------------------------------------------------------------------------------------------------------------------------------------------------------------------------------------------------------------------------------------------------------------------------------------------------------------------------------------------------------------------------------------------------------------------------------------------------------------------------------------------------------------------------------------------------------------------------------------------------------------------------------------------------------------------------------------------------------------------------------------------------------------------------------------------------------------------------------------------------------------------------------------------------|
| Journal:                        | <i>BMJ Open</i>                                                                                                                                                                                                                                                                                                                                                                                                                                                                                                                                                                                                                                                                                                                                                                                                                                                                                                                                                                                                                                                                                                                                                                                                                                                                                                                                                               |
| Manuscript ID                   | bmjopen-2020-040100.R1                                                                                                                                                                                                                                                                                                                                                                                                                                                                                                                                                                                                                                                                                                                                                                                                                                                                                                                                                                                                                                                                                                                                                                                                                                                                                                                                                        |
| Article Type:                   | Protocol                                                                                                                                                                                                                                                                                                                                                                                                                                                                                                                                                                                                                                                                                                                                                                                                                                                                                                                                                                                                                                                                                                                                                                                                                                                                                                                                                                      |
| Date Submitted by the Author:   | 07-Sep-2020                                                                                                                                                                                                                                                                                                                                                                                                                                                                                                                                                                                                                                                                                                                                                                                                                                                                                                                                                                                                                                                                                                                                                                                                                                                                                                                                                                   |
| Complete List of Authors:       | Vivash, Lucy; Monash University, Neurosciences; Alfred Hospital, Neurology<br>Malpas, Charles; Royal Melbourne Hospital, The University of Melbourne, Department of Neurology; University of Melbourne, Medicine and Radiology<br>Churilov, Leonid; University of Melbourne, Medicine and Radiology<br>Walterfang, Mark; Royal Melbourne Hospital, Neuropsychiatry; University of Melbourne, Melbourne Neuropsychiatry<br>Brodthmann, Amy; Florey Institute for Neuroscience and Mental Health; Monash University, Eastern Cognitive Disorders Clinic<br>Piguet, Olivier; University of Sydney - Mallett Street Campus, Brain and Mind Centre; The University of Sydney, School of Psychology<br>Ahmed, Rebekah; The University of Sydney, Brain and Mind Centre; Royal Prince Alfred Hospital, Memory and Cognition Clinic<br>Bush, Ashley; The University of Melbourne, Florey Department of Neuroscience and Mental Health<br>Hovens, Christopher; Royal Melbourne Hospital, The University of Melbourne, Department of Surgery<br>Kalincik, T; The University of Melbourne, Medicine and Radiology<br>Darby, David; The Florey Institute of Neuroscience and Mental Health; Alfred Hospital, Neurology<br>Velakoulis, Dennis; Royal Melbourne Hospital, Neuropsychiatry; University of Melbourne, Melbourne Neuropsychiatry Centre<br>O'Brien, Terence; Monash University |
| <b>Primary Subject Heading</b>: | Neurology                                                                                                                                                                                                                                                                                                                                                                                                                                                                                                                                                                                                                                                                                                                                                                                                                                                                                                                                                                                                                                                                                                                                                                                                                                                                                                                                                                     |
| Secondary Subject Heading:      | Pharmacology and therapeutics                                                                                                                                                                                                                                                                                                                                                                                                                                                                                                                                                                                                                                                                                                                                                                                                                                                                                                                                                                                                                                                                                                                                                                                                                                                                                                                                                 |
| Keywords:                       | Dementia < NEUROLOGY, Clinical trials < THERAPEUTICS, PSYCHIATRY                                                                                                                                                                                                                                                                                                                                                                                                                                                                                                                                                                                                                                                                                                                                                                                                                                                                                                                                                                                                                                                                                                                                                                                                                                                                                                              |
|                                 |                                                                                                                                                                                                                                                                                                                                                                                                                                                                                                                                                                                                                                                                                                                                                                                                                                                                                                                                                                                                                                                                                                                                                                                                                                                                                                                                                                               |

SCHOLARONE™  
Manuscripts

1  
2  
3  
4  
5  
6  
7  
8  
9  
10  
11  
12  
13  
14  
15  
16  
17  
18  
19  
20  
21  
22  
23  
24  
25  
26  
27  
28  
29  
30  
31  
32  
33  
34  
35  
36  
37  
38  
39  
40  
41  
42  
43  
44  
45  
46  
47  
48  
49  
50  
51  
52  
53  
54  
55  
56  
57  
58  
59  
60



I, the Submitting Author has the right to grant and does grant on behalf of all authors of the Work (as defined in the below author licence), an exclusive licence and/or a non-exclusive licence for contributions from authors who are: i) UK Crown employees; ii) where BMJ has agreed a CC-BY licence shall apply, and/or iii) in accordance with the terms applicable for US Federal Government officers or employees acting as part of their official duties; on a worldwide, perpetual, irrevocable, royalty-free basis to BMJ Publishing Group Ltd ("BMJ") its licensees and where the relevant Journal is co-owned by BMJ to the co-owners of the Journal, to publish the Work in this journal and any other BMJ products and to exploit all rights, as set out in our [licence](#).

The Submitting Author accepts and understands that any supply made under these terms is made by BMJ to the Submitting Author unless you are acting as an employee on behalf of your employer or a postgraduate student of an affiliated institution which is paying any applicable article publishing charge ("APC") for Open Access articles. Where the Submitting Author wishes to make the Work available on an Open Access basis (and intends to pay the relevant APC), the terms of reuse of such Open Access shall be governed by a Creative Commons licence – details of these licences and which [Creative Commons](#) licence will apply to this Work are set out in our licence referred to above.

Other than as permitted in any relevant BMJ Author's Self Archiving Policies, I confirm this Work has not been accepted for publication elsewhere, is not being considered for publication elsewhere and does not duplicate material already published. I confirm all authors consent to publication of this Work and authorise the granting of this licence.

1  
2  
3 **A study protocol for a phase II randomized, double-blind, placebo-controlled trial of**  
4 **sodium selenate as a disease-modifying treatment for behavioural variant**  
5 **frontotemporal dementia**  
6  
7  
8

9 **Authors:** Lucy Vivash<sup>1,2,3,4</sup>, Charles B Malpas<sup>1,2,3,5</sup>, Leonid Churilov<sup>4</sup>, Mark Walterfang<sup>6,7</sup>,  
10 Amy Brodtmann<sup>3,8,9,10</sup>, Olivier Piguet<sup>11,12</sup>, Rebekah M Ahmed<sup>12,13</sup>, Ashley I. Bush<sup>8,9</sup>,  
11 Christopher M Hovens<sup>14</sup>, Tomas Kalincik<sup>3,5</sup>, David Darby<sup>1,2,3,4,8</sup>, Dennis Velakoulis<sup>6,7</sup>,  
12 Terence J. O'Brien<sup>1,2,3,4</sup>.  
13  
14  
15  
16

17 **Affiliations:**

18 <sup>1</sup> Department of Neurosciences, Central Clinical School, Monash University, Melbourne  
19 Australia

20 <sup>2</sup> Department of Neurology, Alfred Hospital, Melbourne, 3004, Australia

21 <sup>3</sup> Department of Neurology, Royal Melbourne Hospital, Parkville, 3052, Australia

22 <sup>4</sup> Department of Medicine and Radiology, The University of Melbourne, Parkville, 3052,  
23 Australia

24 <sup>5</sup> CORe, Department of Medicine, The Royal Melbourne Hospital, The University of  
25 Melbourne, Parkville, 3052, Australia

26 <sup>6</sup> Neuropsychiatry Unit, Royal Melbourne Hospital, Parkville, 3052, Australia

27 <sup>7</sup> Melbourne Neuropsychiatry Centre, University of Melbourne and North-Western Mental  
28 Health, Parkville, 3052, Australia

29 <sup>8</sup> The Florey Institute for Neuroscience and Mental Health, Melbourne, Australia

30 <sup>9</sup> Melbourne Dementia Research Centre, University of Melbourne, Australia

31 <sup>10</sup> Eastern Cognitive Disorders Clinic, Monash University, Melbourne, Australia

32 <sup>11</sup> The University of Sydney, School of Psychology, Sydney, Australia

33 <sup>12</sup> The University of Sydney, Brain & Mind Centre, Sydney, Australia

34 <sup>13</sup> Memory and Cognition Clinic, Royal Prince Alfred Hospital, Sydney, Australia

35 <sup>14</sup> Department of Surgery, Royal Melbourne Hospital, University of Melbourne  
36  
37  
38  
39  
40

41 **Author Contributions:** LV drafted the manuscript. LV, CM, LC, MW, AB, OP, RA, AIB,  
42 CH, TK, DD, DV and TOB contributed to study design. All authors edited the manuscript  
43 and approved the final version.  
44  
45  
46

47 **Funding Statement:** This work is supported by the Australian National Health and Medical  
48 Research Council (NHMRC) Medical Research Future Fund grant number APP1170276. OP  
49 is supported by an NHMRC Senior Research Fellowship (GNT1103258).  
50  
51

52 **Competing Interests Statement:** All authors report a grant from the NHMRC to support this  
53 study. The authors report the following disclosures outside of this study: LV reports personal  
54 fees from Biogen Australia. AIB reports personal fees from Collaborative Medicinal  
55 Development Pty Ltd, and shares in Alterity, Cogstate Ltd, Grunbionics and Mesoblast Ltd.  
56 CH reports issued patents US 9,415,063 and US 8,920,951. TK reports grants from the  
57 University of Melbourne and Biogen Australia Pty Ltd; personal fees from Biogen, Roche,  
58 Genzyme-Sanofi, Merck, Novartis, WebMD Global, Teva and BioCSL; and non-financial  
59 support from Biogen, Genzyme-Sanofi and Merck. TOB reports research funding from  
60

1  
2  
3 Biogen, Eisai, UCB, Anavex and Praxis. CM, LC MW, AB, OP, RA, DD and DV have  
4 nothing to disclose  
5

6  
7 **Corresponding Author:** Dr Lucy Vivash  
8 Dept of Neurosciences  
9 Level 6 The Alfred Centre  
10 Monash University  
11 99 Commercial Road  
12 Melbourne, 3004  
13 Australia  
14 [lucy.vivash@monash.edu](mailto:lucy.vivash@monash.edu)  
15  
16  
17  
18  
19  
20  
21  
22  
23  
24  
25  
26  
27  
28  
29  
30  
31  
32  
33  
34  
35  
36  
37  
38  
39  
40  
41  
42  
43  
44  
45  
46  
47  
48  
49  
50  
51  
52  
53  
54  
55  
56  
57  
58  
59  
60



## Abstract

*Introduction:* Behavioural variant frontotemporal dementia (bvFTD) is a neurodegenerative disorder often neuropathologically associated with the accumulation of abnormally hyperphosphorylated tau, for which there is currently no disease modifying treatment. Previous work by our group has shown sodium selenate upregulates the activity of PP2A in the brain, increasing the rate of tau dephosphorylation. The objective of this study is to evaluate the efficacy and safety of sodium selenate as a disease-modifying treatment for bvFTD.

*Methods and analysis:* This will be a multi-site, phase 2b, double-blind placebo-controlled trial of sodium selenate. One hundred and twenty participants will be enrolled across 4 Australian academic hospitals. Following screening eligible participants will be randomised (1:1) to sodium selenate (15mg three times a day) or placebo for 52 weeks. Participants will have regular safety and efficacy visits throughout the study period. The primary study outcome will be percentage brain volume change (PBVC) as measured on MRI over 52 weeks of treatment. This will be analysed with a general linear model (ANCOVA) with the PBVC as an output, the treatment as an input, and the baseline brain volume as covariate for adjustment purposes. Secondary outcomes include safety and tolerability measures, and efficacy measures; change in CSF total-tau, Addenbrooke's Cognitive Examination-III and Cambridge Behavioural Inventory-Revised scores over the 52 weeks of treatment. These will also be analysed with analysis of covariance (ANCOVA) where the corresponding baseline measure will be incorporated in the model. Additional exploratory outcomes will include other imaging, cognitive and biospecimen analyses.

*Ethics and dissemination:* The study was approved by the Human Research & Ethics Committee of the lead site as part of the Australian Multisite Ethics approval system. The results of the study will be presented at national and international conferences and published in peer-reviewed journals.

*Trial registration number:* ACTRN12620000236998

## Strengths and Limitations

- A large placebo-controlled RCT of a new drug for behavioural variant frontotemporal dementia (bvFTD)
- Extensive clinical, cognitive and imaging data will be collected producing a highly characterised prospective patient cohort which will be of huge significance to the field
- A mixture of established and novel diagnostic methods will be used, potentially validating new diagnostic approaches for future use
- Due to difficulty identifying pathology of bvFTD in life, some participants may not have the pathology targeted by this drug

## Background

Behavioural-variant frontotemporal dementia (bvFTD) is the most common clinical syndrome caused by frontotemporal lobar degeneration (FTLD). It is a neurodegenerative disease characterised by the development of progressive behavioural features including disinhibition, apathy, loss of empathy, perseveration and stereotyped behaviour. bvFTD is a devastating condition for both patients and their families, and is invariably fatal. Prevalence rates of bvFTD range from 15-50 cases per 100,000 people [1-3]. No approved disease-modifying treatments currently exist for bvFTD, and the few international clinical trials that have been carried out have been unsuccessful [4]. A major unmet need therefore exists in the treatment of this condition. Approximately 45% of bvFTD cases are classified as ‘tauopathies’, neuropathologically characterised by abnormally hyperphosphorylated inclusions of the microtubule-associated protein *tau* [5]. Hyperphosphorylated tau dissociates from microtubules and aggregates in to filamentous tau deposits, disrupting axonal structure and transport leading to neurodegeneration. Targeting this hyperphosphorylated tau is a promising treatment strategy for these patients that requires validation with randomised clinical trials [6].

### *Targeting hyperphosphorylated tau*

Two broad approaches are possible to pharmacologically reduce tau hyperphosphorylation in the brain: 1) *inhibition* of tau serine/threonine kinases, or 2) *activation* of tau serine/threonine phosphatases. Multiple kinases have been implicated in the phosphorylation of tau, hence a more feasible strategy is the upregulation of protein phosphatase 2 (PP2A), the major tau serine/threonine phosphatase present in the brain, which accounts for over 70% of phosphatase activity [7]. PP2A is co-localised with tau [8-10], and reductions in PP2A activity, and therefore reduced tau dephosphorylation are observed in many neurodegenerative diseases. Further, PP2A activity negatively correlates with tau levels in human tissue [10].

Selenium is an essential trace element in humans and is present in low concentrations in food and the environment. Whilst numerous studies have reported potential chemopreventive benefits associated with selenium dietary supplementation, the therapeutic potential of other selenium compounds has not been widely explored. A large body of pre-clinical, and emerging clinical data, have provided evidence for the potential of sodium selenate, an oxidised salt of selenium, as a disease-modifying treatment for hyperphosphorylated tau-based neurodegenerative diseases, traumatic brain injury, and epilepsy [11-21]. Our research has not only demonstrated significant therapeutic benefits in preclinical models of cancer [12], Alzheimer’s disease [13, 22], epilepsy [15, 16, 18, 21] and traumatic brain injury [11, 18, 19], but also has showed that these benefits were restricted to the administration of the single selenium species, sodium selenate, and were only beneficial in a therapeutic setting when administered in supranutritional doses [17, 23].

### *Clinical Trials of Sodium Selenate for Other Conditions*

Two clinical trials have demonstrated the safety and tolerability of sodium selenate in patients with diseases other than FTD. First, a Phase I study in patients with castration-resistant prostate cancer demonstrated a favourable safety profile of VEL015 (sodium selenate) [12]. This study demonstrated that doses up to 60mg per day were tolerable in chronic dosing, with dose-limiting toxicity observed at 90mg per day.

More recently, our group completed and published a Phase IIa trial of sodium selenate (30mg/day) in 40 patients with mild-moderate Alzheimer’s disease (AD), which confirmed

1  
2  
3 the safety and tolerability of the agent [17, 23]. This AD study was designed to evaluate  
4 safety and tolerability and not treatment efficacy, however MR diffusion tensor imaging  
5 (DTI) measures were exploratory outcome measures in this study. Voxel-wise analysis of  
6 DTI metrics showed relatively less degeneration in the treatment group compared to placebo,  
7 which was widespread, but most prominent in the corpus callosum [17]. Selenium levels in  
8 patients' serum and CSF were higher in the treatment group, which is evidence of penetration  
9 of the agent across the blood-brain barrier and into the CNS [23]. In patients treated with  
10 10mg tds of sodium selenate, serum selenium levels increased from  $145.4 \pm 28.8$   $\mu\text{g/L}$  at  
11 baseline to  $858.3 \pm 446.1$   $\mu\text{g/L}$  at week 24, and CSF selenium levels increased from  $1.4 \pm 0.5$   
12  $\mu\text{g/L}$  to  $20.2 \pm 9.1$   $\mu\text{g/L}$ , no change in serum or CSF levels was observed in the placebo-  
13 treated patients [23]. In addition, selenium levels were inversely correlated with the degree of  
14 decline in cognitive measures over the 6-month treatment period, indicating a relationship  
15 between drug exposure and neuroprotective efficacy [23].  
16  
17  
18  
19

### 20 *Phase 1 Open-label Trial of Sodium Selenate for bvFTD*

21 We are currently undertaking a single site, exploratory, Phase Ib open labelled study of sodium  
22 selenate as a treatment for patients with bvFTD (ACTRN12617001218381,  
23 <https://anzctr.org.au>). The primary objective is to assess the safety and tolerability of a  
24 supranutritional dose of sodium selenate in patients with possible bvFTD. Twelve patients have  
25 been recruited, and eight patients have completed the 12-month treatment phase so far. There  
26 have been no withdrawals, and adverse effects have been relatively mild and similar to those  
27 experienced in the Phase IIa AD trial [17].  
28  
29

30 Informed by this experience, we will now conduct a multi-centred placebo-controlled  
31 randomised controlled trial of sodium selenate as a treatment for bvFTD.  
32  
33

### 34 **Aims/Outcomes**

35 The aim of this study is to investigate the efficacy and safety of sodium selenate (15 mg,  
36 three times a day) as a disease-modifying treatment of probable bvFTD.  
37  
38

39 The primary outcome variable is change in whole brain volume over 52 weeks of treatment.

40 The secondary outcome variables (safety) will be rate and severity of adverse events and rate  
41 of study withdrawal. Secondary efficacy outcome variables are change in cerebrospinal fluid  
42 (CSF) total-tau, change in cognition as measured by the Addenbrooke's Cognitive  
43 Examination-III (ACE-III) total score and change in behaviour as measured by the  
44 Cambridge Behavioural Inventory-Revised (CBI) total score over 52 weeks.  
45

46 Additional exploratory outcomes will investigate changes in CSF, serum and plasma protein  
47 biomarkers (total-tau, phospho-tau and neurofilament light chain (NfL)), changes in other  
48 measures of cognition and behaviour (memory, language, executive function, attention), and  
49 changes in additional neuroimaging measures, including cortical thickness, volumetrics,  
50 advanced MRI (diffusion, quantitative susceptibility mapping (QSM), resting state) and  
51 fluoro-deoxy glucose (FDG) and tau-binding positron emission tomography (PET). The study  
52 will also use advanced statistical modelling to identify predictors of treatment response and  
53 non-response, and correlations between biomarkers and cognitive function and behaviour.  
54  
55

### 56 **Methods/Design**

57 This is a multi-site, phase 2b double-blind, randomised, placebo-controlled trial of sodium  
58 selenate as a treatment for probable bvFTD. Patients will receive 52 weeks of treatment with  
59  
60

1  
2  
3 either sodium selenate (15 mg tds) or placebo. 120 patients will be recruited in to this study.  
4 The study will be conducted at 4 centres in Melbourne and Sydney. The study is funded by  
5 the Australian National Health and Medical Research Council (NHMRC; APP1170276).  
6 Ethics approval was granted by the Alfred Health Human Research Ethics Committee,  
7 Melbourne (609/19). The trial is registered with ANZCTR (ACTRN12620000236998)  
8  
9

### 10 11 *Eligibility Criteria*

12  
13 Inclusion criteria: Participants will be aged over 35, have a diagnosis of probable bvFTD [24]  
14 and a modified Hachinski score <5 [25]. Participants must be using effective contraception  
15 for the duration of the trial. Participants must have a lumbar puncture and MRI performed  
16 during screening. The structural brain MRI must be consistent with a bvFTD diagnosis with  
17 no other gross structural abnormalities indicating another neurological disorder. The  
18 participant must have a negative amyloid-PET scan (either as part of screening assessments  
19 or historical). The participant must live in the community and have at least 10 contact hours  
20 per week with a responsible carer. The carer should be capable of ensuring the participant's  
21 compliance with the medication and study, and complete questionnaires about the  
22 participant's behaviour throughout the study. Written informed consent must be obtained  
23 from the participant or their legally authorised representative (as required by local laws and  
24 regulations), and the participant's carer.  
25  
26

27 Exclusion Criteria: Participants will be excluded based on; history of substance use disorder  
28 (including alcohol and cannabis); previous participation in an interventional clinical trial  
29 (within 3 months of screening), with the exception of prior exposure to sodium selenate;  
30 known sensitivity to selenium, sodium selenate, any medicine or vitamin containing sodium  
31 selenate, similar agents or any of the excipients (including microcrystalline cellulose) used;  
32 known history of familial Alzheimer's disease or genetic form of FTD that is not considered  
33 a primary tauopathy (e.g., *GRN* mutation or *C9ORF72* expansion); lifelong primary  
34 psychiatric disorder; significant traumatic brain injury with loss of consciousness >5 mins;  
35 significant medical or neurological disease, with the exception of bvFTD that is not  
36 adequately controlled by therapy and may interfere with the patient's ability to complete the  
37 study or affect the patient's cognitive performance; contraindication to MRI or LP;  
38 significant impairment of renal, hepatic or haematological function; participant is or has  
39 (within 6 weeks of the screening visit) taken any of the following: NMDA receptor  
40 antagonists, oral and/or injectable steroids, digoxin, phenobarbitone or warfarin;  
41 commencement or titration of other medications known to have an effect on mood or  
42 cognition within the 4 weeks prior to screening, including anticholinergics, hypnotics,  
43 sedatives, anxiolytics, antidepressants, antiepileptics, antipsychotics, memory-enhancing  
44 drugs, nutraceuticals, and other supplements which contain selenium.  
45  
46  
47  
48

### 49 50 *Intervention, Randomisation and Blinding*

51 Each participant will be provided a unique screening number upon signing the consent form.  
52 Once all screening assessments have been completed and the participant is eligible to  
53 continue, the participant will be assigned a sequential randomisation number generated  
54 within the redcap eCRF (subject to entry of key data into the eCRF). This randomisation  
55 number will be provided to the unblinded site pharmacist who will dispense the drug/placebo  
56 in accordance with the randomisation schedule.  
57

58 Participants will receive either sodium selenate or placebo (1:1) for 52 weeks. Each capsule  
59 will contain 5 mg of drug or placebo. The initial dose will be two capsules (10 mg) three  
60

1  
2  
3 times a day (tds), increasing to three capsules (15mg) tds at week 4, subject to tolerability. In  
4 the event of adverse events potentially related to the study drug administration, treatment  
5 may be temporarily interrupted and a single within-subject dose reduction, to 10 mg tds will,  
6 at the investigator's discretion, be allowed. An additional down-titration to 5 mg tds will only  
7 be allowed after consultation with the medical monitor.  
8

9  
10 The study participant, their study partner and all site staff (with the exception of the pharmacy  
11 team) will remain blinded throughout the course of the study. Individual unblinding envelopes  
12 for emergency unblinding of individual patients will be kept at the study sites. The data safety  
13 monitoring board (DSMB) will also be blind to study treatment when reviewing safety data. In  
14 the event of unexpected adverse events the DSMB may request unblinding of data to assess  
15 potential causality.  
16

### 17 *Procedures and Assessments*

18  
19 Participants will undergo study testing and procedures as outlined in Table 1. Briefly, at the  
20 screening assessment, the participant will be reviewed to ensure they meet all the inclusion  
21 criteria and none of the exclusion criteria. Neuroimaging (MRI, and amyloid-PET) will  
22 follow to strengthen the bvFTD diagnosis (and exclude Alzheimer's disease). At the baseline  
23 visit, the inclusion and exclusion criteria will be reviewed to ensure the participant remains  
24 eligible for the study. The participant will undergo an FDG-PET, baseline CSF sampling and  
25 a cognitive and behavioural assessment. Lastly the participant will be administered the study  
26 drug (10mg) in the clinic and multiple blood draws taken for pharmacokinetic analysis.  
27  
28

29 Follow-up phone calls will be made to monitor for adverse events. If participants are  
30 tolerating the study drug, they will be instructed to increase to 3 capsules (15mg tds) at week  
31 4. Diary cards will be given to participants to record adverse events that occur between clinic  
32 visits.  
33

34 Participants will attend regular in-clinic study visits to assess their safety and well-being, and  
35 to resupply the study medication. The cognitive and behavioural assessment will be repeated  
36 at weeks 26 and 52. Prior to their week 52 clinical visit participants will undergo repeat  
37 neuroimaging (MRI, FDG-PET) and CSF sampling for biomarker analyses. Participants will  
38 attend a final safety follow up visit 4 weeks following the cessation of the study drug.  
39  
40

### 41 *Measures*

#### 42 *Neuroimaging*

43  
44 MRIs will be acquired during the screening period and week 52. The MRI protocol includes  
45 the following sequences; volumetric T1 (1mm<sup>3</sup>), T2-space (0.8 x 1.1 x 4mm), volumetric T1  
46 (1mm<sup>3</sup>), multi-band DWI (2.5mm<sup>3</sup>), resting state fMRI (4.5mm<sup>3</sup>), multi-echo QSM  
47 (3.5mm<sup>3</sup>).  
48  
49

50  
51 The primary outcome measure will be the change in whole-brain volume (percentage brain  
52 volume change; PBVC) from baseline to 52 weeks. Whole-brain volume will be measured  
53 using T1-weighted structural MRI acquired at baseline and after 52 weeks of treatment.  
54 Change in whole-brain volume will be computed using the *SIENA* module within the FSL  
55 software [26]. Briefly, *SIENA* performs brain extraction, halfway-space registration, and  
56 tissue segmentation. Perpendicular edge displacement is then computed between the  
57 brain/non-brain edge points of the two images. The accuracy of this method is very high, with  
58 longitudinal error reported at 0.15% [27].  
59  
60

1  
2  
3  
4  
5  
6  
7  
8  
9  
10  
11  
12  
13  
14  
15  
16  
17  
18  
19  
20  
21  
22  
23  
24  
25  
26  
27  
28  
29  
30  
31  
32  
33  
34  
35  
36  
37  
38  
39  
40  
41  
42  
43  
44  
45  
46  
47  
48  
49  
50  
51  
52  
53  
54  
55  
56  
57  
58  
59  
60

Florbetaben PET will be conducted at screening to exclude Alzheimer's disease. 300MBq ( $\pm 10\%$ ) will be injected intravenously, 90 minutes post-injection a dynamic 3D scan (4x300 sec frames) will be acquired. This will not be required for participants who have a historical negative amyloid PET that is available for review by the site principal investigator.

FDG PET will be conducted at baseline and week 52 to assess disease progression. 185 MBq ( $\pm 10\%$ ) will be injected intravenously, the patient will rest in a quiet room for 20 minutes, and a dynamic 3D acquisition will begin 30 minutes post-injection (6x300sec frames). An optional sub-study investigating tau PET as a marker of disease progression will also be conducted. Participants who consent will have two tau PET scans, at baseline and in the two weeks prior to week 52. A dynamic 3D acquisition (12x150 s frames) will begin 45 minutes after the intravenous injection of 185MBq ( $\pm 10\%$ ) of PI-2620.

### Cognitive and Behavioural Battery

The following cognitive and behavioural scales will be administered at baseline, week 26 and week 52 of the study.

*Addenbrooke's Cognitive Examination III:* The Addenbrooke's Cognitive Examination is a broad cognitive screening test of 5 cognitive domains; attention/orientation, memory, language, verbal fluency and visuospatial skills, producing a score out of 100 (normal scores  $\geq 88/100$ ). Administration takes about 15 minutes and three different versions are available [28]. This will be analysed as one of the secondary efficacy endpoints.

*NIH Toolbox:* The NIH Toolbox is a multidimensional battery of measures used to assess cognitive, sensory, motor and emotional function in people. The NIH Toolbox has been validated for ages 3-85 years and is designed such that repeated assessments can be completed for longitudinal monitoring of disease progression. The NIH Toolbox takes approximately 30 minutes to administer [29, 30].

*Hayling Sentence Test:* The Hayling Sentence Completion test is a measure of response initiation and response suppression. It is entirely verbal, and therefore can be administered to patients with problems with reading and visual perception. It consists of two sets of 15 sentences each having the last word missing. In the first section the examiner reads each sentence aloud and the participant has to simply complete the sentences as quickly as possible, yielding a simple measure of response initiation speed. The second part of the Hayling requires participants to complete a sentence with a nonsense ending word, giving measures of response suppression ability and thinking time. It takes approximately 5 minutes to administer and yields three different measures of executive functioning which can be considered separately or combined into an overall score [30].

*Victoria Stroop Test:* The Victoria Stroop Test is a measure of executive function commonly used in neuropsychological evaluation. The test uses three conditions that consist in naming the color of dots, of neutral words, and of color words printed in incongruent colors. Each condition contains 24 items. Because of its short administration time, approximately 5 minutes, it is appropriate for use in geriatric populations and with those suffering from dementia [31].

*Controlled Oral Word Association Test (COWAT):* Controlled Oral Word Association Test, is a verbal fluency test that measures executive function. The participant is asked to name words beginning with a designated letter for one minute under certain conditions (e.g., no repetitions, no proper nouns, no identical stem words) and this procedure is repeated with three different letters. The whole examination usually takes 5–10 minutes [32].

1  
2  
3 *Trail Making Test A and B:* The Trail Making Test is a test of visual attention and task  
4 switching. It consists of two parts in which the subject is instructed to connect a set of 25 targets  
5 as quickly as possible while still maintaining accuracy. There are two parts to the test: in the  
6 first, the targets are all numbers (1, 2, 3, etc.) which the participant must connect sequentially;  
7 in the second part, the subject alternates between numbers and letters (1, A, 2, B, etc.). The  
8 first part of the test is used to primarily measure processing speed, whilst the second part is a  
9 test of executive function. The time to complete the paths are the scores for this assessment  
10 [33].  
11  
12

13 *Digit Span:* The digit span test is a measure of attention and working memory. Participants are  
14 told a sequence of digits (which become progressively longer) which they must repeat back to  
15 the examiner. This test is performed forwards and backwards. The score is the maximum length  
16 of digits they correctly repeated under the two conditions [34].  
17  
18

19 *Sydney Language Battery:* The Sydney Language Battery is a test of language at a single word  
20 level, which measures naming, repetition, comprehension, and semantic association. The same  
21 set of 30 multisyllabic nouns (3 or more syllables) are used across the four tasks. Words are  
22 ordered with decreasing frequency and are graded into three broad levels of difficulty [35].  
23  
24

25 *Mini Social Emotional Assessment (mini-SEA):* The Mini Social Emotional Assessment (mini-  
26 SEA) is a cognitive battery designed to assess social and emotional function. The battery  
27 contains two components: (a) a faux-pas test assessing theory of mind, and (b) a facial  
28 emotional recognition test. The neural correlates of the mini-SEA have been established in  
29 bvFTD, with significant relationships reported with the medial prefrontal cortex (mPFC). The  
30 mini-SEA takes approximately 30 minutes to administer [36].  
31  
32

33 *Cambridge Behavioural Inventory - Revised:* The Cambridge Behavioural Inventory – Revised  
34 (CBI-R) is an informant questionnaire that assesses neuropsychiatric and neurobehavioral  
35 symptoms in patients with neurodegenerative disease [18]. The instrument contains 45  
36 questions assessing the following domains: (a) memory and orientation, (b) everyday skills, (c)  
37 self-care, (d) abnormal behaviour, (e) mood, (f) beliefs, (g) eating habits, (h) sleep, (i)  
38 stereotypic and motor behaviours, and (j) motivation. The instrument takes approximately 10  
39 minutes to complete. A total score is generated that will be used for this study [37]. This will  
40 be analysed as one of the secondary efficacy endpoints.  
41  
42

43 *Caregiver Burden Scale:* The Caregiver Burden Scale (CBS) is a caregiver-completed  
44 instrument that assesses the experience of burden in people who care for those with cognitive  
45 disorders [38]. The instrument contains 22 questions and takes approximately 5 minutes to  
46 complete. A total score is generated that will be used for the present study [38].  
47  
48

## 49 Safety Assessments

50  
51 A 12-ECG and a physical examination will be performed at each clinic visit, haematology,  
52 chemistry and urinalysis will be performed at each clinic visit except week 16. Neurological  
53 examinations will be carried out at screening, baseline, week 26 and 52. Any clinically  
54 significant abnormalities in any of these investigations will be considered adverse events. The  
55 diary cards will be reviewed to ascertain any adverse events that occurred between visits, and  
56 the participant and their study partner interviewed to confirm adverse events and concomitant  
57 therapies.  
58  
59  
60

## Blood biomarkers

Additional blood samples will be collected for pharmacokinetic, biomarker and exploratory analyses. Pharmacokinetic sampling (6ml/sample) will be performed at baseline, week 8 and week 52. A pre-dose (1 hour) sample will be taken, then 4 additional samples, 0.5, 1, 2, 4 hours after dosing. Sodium selenate levels in plasma will subsequently be measured in these samples for determination of the pharmacokinetic profile.

Exploratory sampling will occur at baseline, week 8, week 26 and week 52. Samples will be taken for plasma, serum and PMBC isolation at each of these visits. Blood for DNA and RNA will be taken only at baseline. Exploratory analyses will include measurement of proteins associated with neurodegeneration (total-tau, phospho-tau, beta-amyloid<sub>42</sub>, neurofilament light) in serum and plasma, testing for genetic mutations associated with bvFTD (*MAPT*, *GRN*, *C9ORF72* expansion). As yet undetermined additional testing may be performed.

## CSF biomarkers

CSF sampling will take place at baseline (pre-treatment) and week 52. Atraumatic needles (20G) will be used for sampling. CSF (~20 mL) will be collected in polypropylene tubes (10 mL) cooled on ice. Samples will be kept on ice until processing, aliquoted in to 500 µL polypropylene aliquots and stored at -80 °C. Samples will be analysed for beta-amyloid<sub>42</sub>, total-tau, phospho-tau and NfL protein levels. Additional as yet undetermined testing may also be performed. Change in total-tau will be used as a secondary efficacy outcome measure.

## *Power and Sample Size*

All outcomes are predefined prospectively in hierarchical order, meaning that the trial will be declared positive or negative based on primary outcome. Statistical power has thus been determined on the primary outcome variable (PBVC). Previous studies indicate that the mean annual rate of PBVC in FTD is 3.15% ( $SD = 2.08$ )[39]. The mean atrophy rate in controls is 0.47%. Slowing the rate of atrophy by 50% (half-way between the FTD rate and the control rate = 1.81%) would represent a clinically meaningful treatment effect. Assuming the standard deviation of the FTD group holds across treatment and placebo arms, this would correspond to a medium effect size (Cohen's  $d = 0.64$ ). Given a critical two-tailed alpha of 0.05, recruiting 80 participants (randomised 1:1 into two groups) would yield power of 0.80, to observe such or larger difference. As a proportion of participants will have a non-tau-based pathology (estimated ~30% based on previous experience), therefore we anticipate a sample size of 120 will allow for adequate power. Due to the previously demonstrated safety and tolerability, no interim analyses of efficacy, futility or safety are planned.

## *Outcomes and statistical overview*

### Primary endpoint

The primary outcome measure will be the PBVC from baseline to 52 weeks between the treatment and placebo groups. All participants with a post-baseline MRI will be included in the primary analysis. This will be analysed with a general linear model (ANCOVA) with the PBVC as an output, the treatment as an input, and the baseline brain volume as covariate for adjustment purposes.

### Secondary endpoints



1  
2  
3 All continuous secondary efficacy endpoints will be reported using descriptive statistics (mean,  
4 median, minimum, maximum, standard deviation) by visit. Transformations of these endpoints  
5 (such as change and percentage change) will be summarised similarly.

6 The analysis of change from Baseline to Week 52 in CSF total-tau, ACE-III and CBI-R will  
7 be performed using a general linear model (ANCOVA) where the corresponding baseline  
8 measure will be incorporated as a covariate in the model. Estimates will be obtained from the  
9 model of the adjusted mean change (with 95% confidence limits) in marker for treatment.  
10  
11

## 12 Safety and tolerability

13  
14 For all categorical outcomes frequency tables (number of subjects and percentage) will be  
15 presented by visit, these tables will indicate both the number of subjects in the cohort (N) and  
16 the number of observations (n).

17 Safety and tolerability will be determined by frequency of adverse events (CTCAE score  $\geq 3$ ),  
18 frequency of down-titration events and frequency of study discontinuation.  
19  
20  
21

## 22 *Monitoring and Data Quality*

23 In accordance with GCP and ICH guidelines, the project manager will carry out source  
24 document verification at regular intervals to ensure that the data collected in the eCRF are  
25 accurate and reliable. The frequency of monitoring visits will be determined by the rate of  
26 subject recruitment.  
27  
28

29 An independent medical monitor has been appointed to provide safety oversight during the  
30 conduct of the study, and to review all safety-related events at three-month intervals.  
31

32 The DSMB will consist of the medical monitor, an independent clinician and independent  
33 biostatistician. The first DSMB review will be conducted within two weeks of the third  
34 randomised patient reaching their week 8 visit or within one week of two SAEs occurring,  
35 whichever is first. Subsequent DSMB reviews will occur every six months. Additional DSMB  
36 meetings may be called at the request of the medical monitor or site principal investigators in  
37 the event of urgent safety concerns. After each review the medical monitor will make  
38 recommendations to the principal investigator based on the safety and tolerability issues.  
39  
40

## 41 *Ethics and Dissemination*

42 The study has been approved by the Alfred Hospital Human Research Ethics Committee  
43 (HREC, 609/19). Results of this study will be disseminated through presentations at national  
44 and international conferences and published in peer-reviewed journals. Any amendments to the  
45 protocol will be approved by the HREC prior to implementation and subsequently updated on  
46 ANZCTR.  
47  
48  
49

## 50 *Patient and Public Involvement Statement*

51 Patients were not involved in the study conception or design. All study participants will be  
52 provided with a plain English summary of the results of the study at its conclusion (a  
53 requirement of Australian ethics committees and stated in the study consent form).

54 Dissemination of results to the wider community will be through open events at our hospitals  
55 and Dementia Australia as well as media reports.  
56  
57  
58  
59  
60

1  
2  
3  
4  
5  
6  
7  
8  
9  
10  
11  
12  
13  
14  
15  
16  
17  
18  
19  
20  
21  
22  
23  
24  
25  
26  
27  
28  
29  
30  
31  
32  
33  
34  
35  
36  
37  
38  
39  
40  
41  
42  
43  
44  
45  
46  
47  
48  
49  
50  
51  
52  
53  
54  
55  
56  
57  
58  
59  
60

For peer review only

**Table 1: Schedule of Assessments**

| Visit #                                            | Screening |    | Baseline |    | TC1 | TC2 | TC3 | 3 | 4  | 5  | 6  | 7  | 8  |
|----------------------------------------------------|-----------|----|----------|----|-----|-----|-----|---|----|----|----|----|----|
|                                                    | 1a        | 1b | 2a       | 2b |     |     |     |   |    |    |    |    |    |
| Week                                               | -8 to 0   |    | -2       | 0  | 2   | 4   | 6   | 8 | 16 | 26 | 39 | 52 | 56 |
| Written informed consent                           | X         |    |          |    |     |     |     |   |    |    |    |    |    |
| Assess eligibility                                 | X         |    |          |    |     |     |     |   |    |    |    |    |    |
| Confirmation of eligibility                        |           |    |          | X  |     |     |     |   |    |    |    |    |    |
| Medical history                                    | X         |    |          |    |     |     |     |   |    |    |    |    |    |
| Confirmation of Dx of bvFTD                        | X         |    |          |    |     |     |     |   |    |    |    |    |    |
| MRI scan                                           | X         |    |          |    |     |     |     |   |    |    |    | X  |    |
| Amyloid PET scan                                   |           | X  |          |    |     |     |     |   |    |    |    |    |    |
| FDG PET scan                                       |           |    | X        |    |     |     |     |   |    |    |    | X  |    |
| tau PET scan (optional)                            |           |    | X        |    |     |     |     |   |    |    |    | X  |    |
| Lumbar puncture                                    |           |    | X        |    |     |     |     |   |    |    |    | X  |    |
| Physical examination                               | X         |    |          | X  |     |     |     | X | X  | X  | X  | X  | X  |
| Vital signs                                        | X         |    |          | X  |     |     |     | X | X  | X  | X  | X  | X  |
| 12-Lead ECG                                        | X         |    |          | X  |     |     |     | X | X  | X  | X  | X  | X  |
| Neurological exam                                  | X         |    |          | X  |     |     |     |   |    | X  |    | X  |    |
| Modified HIS                                       | X         |    |          |    |     |     |     |   |    |    |    |    |    |
| ACE                                                | X         |    |          | X  |     |     |     |   |    | X  |    | X  |    |
| Cognitive and Behavioural Battery                  |           |    |          | X  |     |     |     |   |    | X  |    | X  |    |
| C-SSRS                                             | X         |    |          | X  |     |     |     | X | X  | X  | X  | X  | X  |
| Haematology and Biochemistry                       | X         |    |          | X  |     |     |     | X |    | X  | X  | X  | X  |
| Coagulation                                        | X         |    |          |    |     |     |     |   |    |    | X  |    |    |
| Blood collected for future exploratory assessments |           |    | X        |    |     |     |     | X |    | X  |    | X  |    |
| Blood collected for pharmacokinetic analysis       |           |    |          | X  |     |     |     | X |    |    |    | X  |    |
| Urinalysis (dipstick)                              | X         |    |          | X  |     |     |     | X |    | X  | X  | X  | X  |
| Plasma HCG pregnancy test                          | X         |    |          |    |     |     |     |   |    |    |    |    |    |
| Urine pregnancy test                               |           |    |          | X  |     |     |     | X | X  | X  | X  | X  | X  |
| Dispense IP                                        |           |    |          | X  |     |     |     |   | X  | X  | X  |    |    |
| Redispend IP                                       |           |    |          |    |     |     |     | X |    |    |    |    |    |
| IMP Administration                                 |           |    |          | X  |     |     |     | X |    |    |    |    |    |
| Dispense Diary Card                                |           |    |          | X  |     |     |     | X | X  | X  | X  | X  |    |
| Review Diary Card                                  |           |    |          |    | X   | X   | X   | X | X  | X  | X  | X  | X  |
| Review of AEs/SAEs                                 |           |    |          | X  | X   | X   | X   | X | X  | X  | X  | X  | X  |
| Review of concomitant medications.                 | X         |    |          | X  | X   | X   | X   | X | X  | X  | X  | X  | X  |

1. Kettle M, et al. *Module 1: What is frontotemporal dementia? Frontotemporal Dementia Toolkit*. 2011; 1-24]. Available from: [ecdc.org.au/\\_literature\\_64153/What\\_is\\_FTD](http://ecdc.org.au/_literature_64153/What_is_FTD).
2. Coyle-Gilchrist, I.T., et al., *Prevalence, characteristics, and survival of frontotemporal lobar degeneration syndromes*. *Neurology*, 2016. **86**(18): p. 1736-43.
3. Ratnavalli, E., et al., *The prevalence of frontotemporal dementia*. *Neurology*, 2002. **58**(11): p. 1615-21.
4. Piguet, O., F. Kumfor, and J. Hodges, *Diagnosing, monitoring and managing behavioural variant frontotemporal dementia*. *Med J Aust*, 2017. **207**(7): p. 303-308.
5. Chare, L., et al., *New criteria for frontotemporal dementia syndromes: clinical and pathological diagnostic implications*. *Journal of Neurology, Neurosurgery & Psychiatry*, 2014. **85**(8): p. 865-870.
6. Hanger, D.P., B.H. Anderton, and W. Noble, *Tau phosphorylation: the therapeutic challenge for neurodegenerative disease*. *Trends in molecular medicine*, 2009. **15**(3): p. 112-119.
7. Goedert, M., et al., *Protein Phosphatase 2A Is the Major Enzyme in Brain that Dephosphorylates  $\tau$  Protein Phosphorylated by Proline-Directed Protein Kinases or Cyclic AMP-Dependent Protein Kinase*. *Journal of neurochemistry*, 1995. **65**(6): p. 2804-2807.
8. Arnold, S.E., et al., *The topographical and neuroanatomical distribution of neurofibrillary tangles and neuritic plaques in the cerebral cortex of patients with Alzheimer's disease*. *Cerebral cortex*, 1991. **1**(1): p. 103-116.
9. Hyman, B.T., et al., *Alzheimer's disease: cell-specific pathology isolates the hippocampal formation*. *Science*, 1984. **225**: p. 1168-1171.
10. Gong, C.-X., et al., *Phosphorylation of microtubule-associated protein tau is regulated by protein phosphatase 2A in mammalian brain implications for neurofibrillary degeneration in Alzheimer's disease*. *Journal of Biological Chemistry*, 2000. **275**(8): p. 5535-5544.
11. Brady, R., et al., *Sodium selenate treatment mitigates reduction of bone volume following traumatic brain injury in rats*. *Journal of musculoskeletal & neuronal interactions*, 2016. **16**(4): p. 369.
12. Corcoran, N., et al., *Open-label, phase I dose-escalation study of sodium selenate, a novel activator of PP2A, in patients with castration-resistant prostate cancer*. *British journal of cancer*, 2010. **103**(4): p. 462-468.
13. Corcoran, N.M., et al., *Sodium selenate specifically activates PP2A phosphatase, dephosphorylates tau and reverses memory deficits in an Alzheimer's disease model*. *Journal of Clinical Neuroscience*, 2010. **17**(8): p. 1025-1033.
14. Iqbal, K., et al., *Tau pathology in Alzheimer disease and other tauopathies*. *Biochimica et Biophysica Acta (BBA)-Molecular Basis of Disease*, 2005. **1739**(2): p. 198-210.
15. Jones, N.C., et al., *Targeting hyperphosphorylated tau with sodium selenate suppresses seizures in rodent models*. *Neurobiology of disease*, 2012. **45**(3): p. 897-901.
16. Liu, S.J., et al., *Sodium selenate retards epileptogenesis in acquired epilepsy models reversing changes in protein phosphatase 2A and hyperphosphorylated tau*. *Brain*, 2016. **139**(Pt 7): p. 1919-38.
17. Malpas, C.B., et al., *A Phase IIa Randomized Control Trial of VEL015 (Sodium Selenate) in Mild-Moderate Alzheimer's Disease*. *Journal of Alzheimer's Disease*, 2016(Preprint): p. 1-10.

18. Shultz, S.R., et al., *Sodium selenate reduces hyperphosphorylated tau and improves outcomes after traumatic brain injury*. *Brain*, 2015: p. awv053.
19. Tan, X.L., et al., *Sodium selenate, a protein phosphatase 2A activator, mitigates hyperphosphorylated tau and improves repeated mild traumatic brain injury outcomes*. *Neuropharmacology*, 2016. **108**: p. 382-393.
20. Whitehouse, P.J., et al., *Alzheimer's disease and senile dementia: loss of neurons in the basal forebrain*. *Science*, 1982. **215**(4537): p. 1237-1239.
21. Zheng, P., et al., *Hyperphosphorylated tau is implicated in acquired epilepsy and neuropsychiatric comorbidities*. *Molecular neurobiology*, 2014. **49**(3): p. 1532-1539.
22. van Eersel, J., et al., *Sodium selenate mitigates tau pathology, neurodegeneration, and functional deficits in Alzheimer's disease models*. *Proceedings of the National Academy of Sciences*, 2010. **107**(31): p. 13888-13893.
23. Cardoso, B.R., et al., *Supranutritional Sodium Selenate Supplementation Delivers Selenium to the Central Nervous System: Results from a Randomized Controlled Pilot Trial in Alzheimer's Disease*. *Neurotherapeutics*, 2019. **16**(1): p. 192-202.
24. Rascovsky, K., et al., *Sensitivity of revised diagnostic criteria for the behavioural variant of frontotemporal dementia*. *Brain*, 2011. **134**(9): p. 2456-2477.
25. Moroney, J.T., et al., *Meta-analysis of the Hachinski Ischemic Score in pathologically verified dementias*. *Neurology*, 1997. **49**(4): p. 1096-105.
26. Smith, S.M., et al., *Normalized accurate measurement of longitudinal brain change*. *Journal of computer assisted tomography*, 2001. **25**(3): p. 466-475.
27. Smith, S.M., et al., *Accurate, robust, and automated longitudinal and cross-sectional brain change analysis*. *Neuroimage*, 2002. **17**(1): p. 479-489.
28. Hsieh, S., et al., *Validation of the Addenbrooke's Cognitive Examination III in frontotemporal dementia and Alzheimer's disease*. *Dement Geriatr Cogn Disord*, 2013. **36**(3-4): p. 242-50.
29. Kramer, J.H., et al., *NIH EXAMINER: conceptualization and development of an executive function battery*. *Journal of the international neuropsychological society*, 2014. **20**(01): p. 11-19.
30. Burgess, P.a.S., T., *Hayling and Brixton Tests*. 1997: Pearson.
31. Spreen, O., Strauss, E., *A compendium of neuropsychological tests: Administration, norms and commentary*. 2nd ed. 1998, New York: Oxford University Press.
32. Benton, A.L., & Hamsher, K. deS., *Multilingual Aphasia Examination: Mnaul of Instruction*. 1976, Iowa City: University of Iowa.
33. Tombaugh, T.N., *Trail Making Test A and B: normative data stratified by age and education*. *Arch Clin Neuropsychol*, 2004. **19**(2): p. 203-14.
34. Wechsler, D., *Wechsler adult intelligence scale-Fourth Edition (WAIS-IV)*. Vol. 22. 2008, San Antonio, TX: NCS Pearson.
35. Savage, S., et al., *Distinguishing subtypes in primary progressive aphasia: application of the Sydney language battery*. *Dement Geriatr Cogn Disord*, 2013. **35**(3-4): p. 208-18.
36. Bertoux, M., et al., *Social Cognition and Emotional Assessment differentiates frontotemporal dementia from depression*. *J Neurol Neurosurg Psychiatry*, 2012. **83**(4): p. 411-6.
37. Wear, H.J., et al., *The Cambridge behavioural inventory revised*. *Dementia & Neuropsychologia*, 2008. **2**(2): p. 102-107.
38. Zarit, S.H., K.E. Reever, and J. Bach-Peterson, *Relatives of the impaired elderly: correlates of feelings of burden*. *The gerontologist*, 1980. **20**(6): p. 649-655.
39. Chan, D., et al., *Rates of global and regional cerebral atrophy in AD and frontotemporal dementia*. *Neurology*, 2001. **57**(10): p. 1756-63.

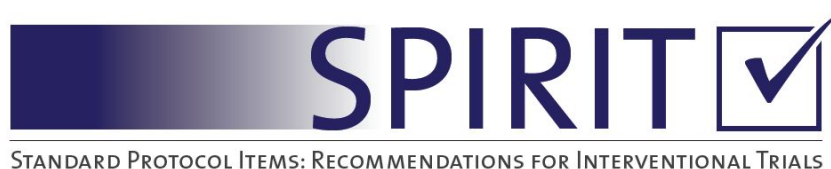

SPIRIT 2013 Checklist: Recommended items to address in a clinical trial protocol and related documents\*

| Section/item                      | ItemNo | PageNo | Description                                                                                                                                                                                                                                                                              |
|-----------------------------------|--------|--------|------------------------------------------------------------------------------------------------------------------------------------------------------------------------------------------------------------------------------------------------------------------------------------------|
| <b>Administrative information</b> |        |        |                                                                                                                                                                                                                                                                                          |
| Title                             | 1      | 1      | Descriptive title identifying the study design, population, interventions, and, if applicable, trial acronym                                                                                                                                                                             |
| Trial registration                | 2a     | 6      | Trial identifier and registry name. If not yet registered, name of intended registry                                                                                                                                                                                                     |
|                                   | 2b     | 6      | All items from the World Health Organization Trial Registration Data Set                                                                                                                                                                                                                 |
| Protocol version                  | 3      | n/a    | Date and version identifier                                                                                                                                                                                                                                                              |
| Funding                           | 4      | 6      | Sources and types of financial, material, and other support                                                                                                                                                                                                                              |
| Roles and responsibilities        | 5a     | 1      | Names, affiliations, and roles of protocol contributors                                                                                                                                                                                                                                  |
|                                   | 5b     | n/a    | Name and contact information for the trial sponsor                                                                                                                                                                                                                                       |
|                                   | 5c     | n/a    | Role of study sponsor and funders, if any, in study design; collection, management, analysis, and interpretation of data; writing of the report; and the decision to submit the report for publication, including whether they will have ultimate authority over any of these activities |
|                                   | 5d     | n/a    | Composition, roles, and responsibilities of the coordinating centre, steering committee, endpoint adjudication committee, data management team, and other individuals or groups overseeing the trial, if applicable (see Item 21a for data monitoring committee)                         |
| <b>Introduction</b>               |        |        |                                                                                                                                                                                                                                                                                          |
| Background and rationale          | 6a     | 4      | Description of research question and justification for undertaking the trial, including summary of relevant studies (published and unpublished) examining benefits and harms for each intervention                                                                                       |

|    |                      |     |         |                                                                                                                                                                                                                                                                                                                                                                                |
|----|----------------------|-----|---------|--------------------------------------------------------------------------------------------------------------------------------------------------------------------------------------------------------------------------------------------------------------------------------------------------------------------------------------------------------------------------------|
| 1  |                      |     |         |                                                                                                                                                                                                                                                                                                                                                                                |
| 2  |                      | 6b  | n/a     | Explanation for choice of comparators                                                                                                                                                                                                                                                                                                                                          |
| 3  |                      |     |         |                                                                                                                                                                                                                                                                                                                                                                                |
| 4  | Objectives           | 7   | 5       | Specific objectives or hypotheses                                                                                                                                                                                                                                                                                                                                              |
| 5  |                      |     |         |                                                                                                                                                                                                                                                                                                                                                                                |
| 6  | Trial design         | 8   | 5       | Description of trial design including type of trial (eg, parallel group, crossover, factorial, single group), allocation ratio, and framework (eg, superiority, equivalence, noninferiority, exploratory)                                                                                                                                                                      |
| 7  |                      |     |         |                                                                                                                                                                                                                                                                                                                                                                                |
| 8  |                      |     |         |                                                                                                                                                                                                                                                                                                                                                                                |
| 9  |                      |     |         |                                                                                                                                                                                                                                                                                                                                                                                |
| 10 |                      |     |         |                                                                                                                                                                                                                                                                                                                                                                                |
| 11 |                      |     |         |                                                                                                                                                                                                                                                                                                                                                                                |
| 12 |                      |     |         | <b>Methods: Participants, interventions, and outcomes</b>                                                                                                                                                                                                                                                                                                                      |
| 13 |                      |     |         |                                                                                                                                                                                                                                                                                                                                                                                |
| 14 |                      |     |         |                                                                                                                                                                                                                                                                                                                                                                                |
| 15 | Study setting        | 9   | 6       | Description of study settings (eg, community clinic, academic hospital) and list of countries where data will be collected. Reference to where list of study sites can be obtained                                                                                                                                                                                             |
| 16 |                      |     |         |                                                                                                                                                                                                                                                                                                                                                                                |
| 17 |                      |     |         |                                                                                                                                                                                                                                                                                                                                                                                |
| 18 |                      |     |         |                                                                                                                                                                                                                                                                                                                                                                                |
| 19 |                      |     |         |                                                                                                                                                                                                                                                                                                                                                                                |
| 20 | Eligibility criteria | 10  | 6       | Inclusion and exclusion criteria for participants. If applicable, eligibility criteria for study centres and individuals who will perform the interventions (eg, surgeons, psychotherapists)                                                                                                                                                                                   |
| 21 |                      |     |         |                                                                                                                                                                                                                                                                                                                                                                                |
| 22 |                      |     |         |                                                                                                                                                                                                                                                                                                                                                                                |
| 23 |                      |     |         |                                                                                                                                                                                                                                                                                                                                                                                |
| 24 |                      |     |         |                                                                                                                                                                                                                                                                                                                                                                                |
| 25 |                      |     |         |                                                                                                                                                                                                                                                                                                                                                                                |
| 26 | Interventions        | 11a | 6       | Interventions for each group with sufficient detail to allow replication, including how and when they will be administered                                                                                                                                                                                                                                                     |
| 27 |                      |     |         |                                                                                                                                                                                                                                                                                                                                                                                |
| 28 |                      |     |         |                                                                                                                                                                                                                                                                                                                                                                                |
| 29 |                      |     |         |                                                                                                                                                                                                                                                                                                                                                                                |
| 30 |                      |     |         |                                                                                                                                                                                                                                                                                                                                                                                |
| 31 |                      | 11b | 7       | Criteria for discontinuing or modifying allocated interventions for a given trial participant (eg, drug dose change in response to harms, participant request, or improving/worsening disease)                                                                                                                                                                                 |
| 32 |                      |     |         |                                                                                                                                                                                                                                                                                                                                                                                |
| 33 |                      |     |         |                                                                                                                                                                                                                                                                                                                                                                                |
| 34 |                      |     |         |                                                                                                                                                                                                                                                                                                                                                                                |
| 35 |                      |     |         |                                                                                                                                                                                                                                                                                                                                                                                |
| 36 |                      | 11c | 7       | Strategies to improve adherence to intervention protocols, and any procedures for monitoring adherence (eg, drug tablet return, laboratory tests)                                                                                                                                                                                                                              |
| 37 |                      |     |         |                                                                                                                                                                                                                                                                                                                                                                                |
| 38 |                      |     |         |                                                                                                                                                                                                                                                                                                                                                                                |
| 39 |                      |     |         |                                                                                                                                                                                                                                                                                                                                                                                |
| 40 |                      |     |         |                                                                                                                                                                                                                                                                                                                                                                                |
| 41 |                      | 11d | 6       | Relevant concomitant care and interventions that are permitted or prohibited during the trial                                                                                                                                                                                                                                                                                  |
| 42 |                      |     |         |                                                                                                                                                                                                                                                                                                                                                                                |
| 43 |                      |     |         |                                                                                                                                                                                                                                                                                                                                                                                |
| 44 | Outcomes             | 12  | 5, 7-10 | Primary, secondary, and other outcomes, including the specific measurement variable (eg, systolic blood pressure), analysis metric (eg, change from baseline, final value, time to event), method of aggregation (eg, median, proportion), and time point for each outcome. Explanation of the clinical relevance of chosen efficacy and harm outcomes is strongly recommended |
| 45 |                      |     |         |                                                                                                                                                                                                                                                                                                                                                                                |
| 46 |                      |     |         |                                                                                                                                                                                                                                                                                                                                                                                |
| 47 |                      |     |         |                                                                                                                                                                                                                                                                                                                                                                                |
| 48 |                      |     |         |                                                                                                                                                                                                                                                                                                                                                                                |
| 49 |                      |     |         |                                                                                                                                                                                                                                                                                                                                                                                |
| 50 |                      |     |         |                                                                                                                                                                                                                                                                                                                                                                                |
| 51 |                      |     |         |                                                                                                                                                                                                                                                                                                                                                                                |
| 52 |                      |     |         |                                                                                                                                                                                                                                                                                                                                                                                |
| 53 |                      |     |         |                                                                                                                                                                                                                                                                                                                                                                                |
| 54 | Participant timeline | 13  | 7, 13   | Time schedule of enrolment, interventions (including any run-ins and washouts), assessments, and visits for participants. A schematic diagram is highly recommended (see Figure)                                                                                                                                                                                               |
| 55 |                      |     |         |                                                                                                                                                                                                                                                                                                                                                                                |
| 56 |                      |     |         |                                                                                                                                                                                                                                                                                                                                                                                |
| 57 |                      |     |         |                                                                                                                                                                                                                                                                                                                                                                                |
| 58 |                      |     |         |                                                                                                                                                                                                                                                                                                                                                                                |
| 59 |                      |     |         |                                                                                                                                                                                                                                                                                                                                                                                |
| 60 |                      |     |         |                                                                                                                                                                                                                                                                                                                                                                                |

|    |                                  |     |      |                                                          |
|----|----------------------------------|-----|------|----------------------------------------------------------|
| 1  |                                  |     |      |                                                          |
| 2  | Sample size                      | 14  | 10   | Estimated number of participants needed to achieve       |
| 3  |                                  |     |      | study objectives and how it was determined, including    |
| 4  |                                  |     |      | clinical and statistical assumptions supporting any      |
| 5  |                                  |     |      | sample size calculations                                 |
| 6  |                                  |     |      |                                                          |
| 7  | Recruitment                      | 15  | 10   | Strategies for achieving adequate participant            |
| 8  |                                  |     |      | enrolment to reach target sample size                    |
| 9  |                                  |     |      |                                                          |
| 10 |                                  |     |      |                                                          |
| 11 |                                  |     |      | <b>Methods: Assignment of interventions (for</b>         |
| 12 |                                  |     |      | <b>controlled trials)</b>                                |
| 13 |                                  |     |      |                                                          |
| 14 | Allocation:                      |     |      |                                                          |
| 15 |                                  |     |      |                                                          |
| 16 | Sequence generation              | 16a | 11   | Method of generating the allocation sequence (eg,        |
| 17 |                                  |     |      | computer-generated random numbers), and list of          |
| 18 |                                  |     |      | any factors for stratification. To reduce predictability |
| 19 |                                  |     |      | of a random sequence, details of any planned             |
| 20 |                                  |     |      | restriction (eg, blocking) should be provided in a       |
| 21 |                                  |     |      | separate document that is unavailable to those who       |
| 22 |                                  |     |      | enrol participants or assign interventions               |
| 23 |                                  |     |      |                                                          |
| 24 |                                  |     |      |                                                          |
| 25 | Allocation concealment mechanism | 16b | 11   | Mechanism of implementing the allocation sequence        |
| 26 |                                  |     |      | (eg, central telephone; sequentially numbered,           |
| 27 |                                  |     |      | opaque, sealed envelopes), describing any steps to       |
| 28 |                                  |     |      | conceal the sequence until interventions are assigned    |
| 29 |                                  |     |      |                                                          |
| 30 |                                  |     |      |                                                          |
| 31 |                                  |     |      |                                                          |
| 32 | Implementation                   | 16c | 11   | Who will generate the allocation sequence, who will      |
| 33 |                                  |     |      | enrol participants, and who will assign participants to  |
| 34 |                                  |     |      | interventions                                            |
| 35 |                                  |     |      |                                                          |
| 36 | Blinding (masking)               | 17a | 12   | Who will be blinded after assignment to interventions    |
| 37 |                                  |     |      | (eg, trial participants, care providers, outcome         |
| 38 |                                  |     |      | assessors, data analysts), and how                       |
| 39 |                                  |     |      |                                                          |
| 40 |                                  |     |      |                                                          |
| 41 |                                  | 17b | 12   | If blinded, circumstances under which unblinding is      |
| 42 |                                  |     |      | permissible, and procedure for revealing a               |
| 43 |                                  |     |      | participant's allocated intervention during the trial    |
| 44 |                                  |     |      |                                                          |
| 45 |                                  |     |      |                                                          |
| 46 |                                  |     |      | <b>Methods: Data collection, management, and</b>         |
| 47 |                                  |     |      | <b>analysis</b>                                          |
| 48 |                                  |     |      |                                                          |
| 49 | Data collection methods          | 18a | 7-10 | Plans for assessment and collection of outcome,          |
| 50 |                                  |     |      | baseline, and other trial data, including any related    |
| 51 |                                  |     |      | processes to promote data quality (eg, duplicate         |
| 52 |                                  |     |      | measurements, training of assessors) and a               |
| 53 |                                  |     |      | description of study instruments (eg, questionnaires,    |
| 54 |                                  |     |      | laboratory tests) along with their reliability and       |
| 55 |                                  |     |      | validity, if known. Reference to where data collection   |
| 56 |                                  |     |      | forms can be found, if not in the protocol               |
| 57 |                                  |     |      |                                                          |
| 58 |                                  |     |      |                                                          |
| 59 |                                  |     |      |                                                          |
| 60 |                                  |     |      |                                                          |



|    |             |     |       |                                                           |
|----|-------------|-----|-------|-----------------------------------------------------------|
| 1  |             |     |       |                                                           |
| 2  |             | 18b | n/a   | Plans to promote participant retention and complete       |
| 3  |             |     |       | follow-up, including list of any outcome data to be       |
| 4  |             |     |       | collected for participants who discontinue or deviate     |
| 5  |             |     |       | from intervention protocols                               |
| 6  |             |     |       |                                                           |
| 7  | Data        | 19  | 11    | Plans for data entry, coding, security, and storage,      |
| 8  | management  |     |       | including any related processes to promote data           |
| 9  |             |     |       | quality (eg, double data entry; range checks for data     |
| 10 |             |     |       | values). Reference to where details of data               |
| 11 |             |     |       | management procedures can be found, if not in the         |
| 12 |             |     |       | protocol                                                  |
| 13 |             |     |       |                                                           |
| 14 |             |     |       |                                                           |
| 15 | Statistical | 20a | 10-11 | Statistical methods for analysing primary and             |
| 16 | methods     |     |       | secondary outcomes. Reference to where other              |
| 17 |             |     |       | details of the statistical analysis plan can be found, if |
| 18 |             |     |       | not in the protocol                                       |
| 19 |             |     |       |                                                           |
| 20 |             |     |       |                                                           |
| 21 |             | 20b | n/a   | Methods for any additional analyses (eg, subgroup         |
| 22 |             |     |       | and adjusted analyses)                                    |
| 23 |             |     |       |                                                           |
| 24 |             | 20c | 10    | Definition of analysis population relating to protocol    |
| 25 |             |     |       | non-adherence (eg, as randomised analysis), and           |
| 26 |             |     |       | any statistical methods to handle missing data (eg,       |
| 27 |             |     |       | multiple imputation)                                      |
| 28 |             |     |       |                                                           |
| 29 |             |     |       |                                                           |
| 30 |             |     |       | <b>Methods: Monitoring</b>                                |
| 31 |             |     |       |                                                           |
| 32 | Data        | 21a | 11    | Composition of data monitoring committee (DMC);           |
| 33 | monitoring  |     |       | summary of its role and reporting structure; statement    |
| 34 |             |     |       | of whether it is independent from the sponsor and         |
| 35 |             |     |       | competing interests; and reference to where further       |
| 36 |             |     |       | details about its charter can be found, if not in the     |
| 37 |             |     |       | protocol. Alternatively, an explanation of why a DMC      |
| 38 |             |     |       | is not needed                                             |
| 39 |             |     |       |                                                           |
| 40 |             |     |       |                                                           |
| 41 |             | 21b | 10-11 | Description of any interim analyses and stopping          |
| 42 |             |     |       | guidelines, including who will have access to these       |
| 43 |             |     |       | interim results and make the final decision to            |
| 44 |             |     |       | terminate the trial                                       |
| 45 |             |     |       |                                                           |
| 46 |             |     |       |                                                           |
| 47 | Harms       | 22  | 7     | Plans for collecting, assessing, reporting, and           |
| 48 |             |     |       | managing solicited and spontaneously reported             |
| 49 |             |     |       | adverse events and other unintended effects of trial      |
| 50 |             |     |       | interventions or trial conduct                            |
| 51 |             |     |       |                                                           |
| 52 |             |     |       |                                                           |
| 53 | Auditing    | 23  | n/a   | Frequency and procedures for auditing trial conduct,      |
| 54 |             |     |       | if any, and whether the process will be independent       |
| 55 |             |     |       | from investigators and the sponsor                        |
| 56 |             |     |       |                                                           |
| 57 |             |     |       |                                                           |
| 58 |             |     |       | <b>Ethics and dissemination</b>                           |
| 59 |             |     |       |                                                           |
| 60 |             |     |       |                                                           |

|    |                   |     |     |                                                            |
|----|-------------------|-----|-----|------------------------------------------------------------|
| 1  |                   |     |     |                                                            |
| 2  | Research          | 24  | 6   | Plans for seeking research ethics                          |
| 3  | ethics            |     |     | committee/institutional review board (REC/IRB)             |
| 4  | approval          |     |     | approval                                                   |
| 5  |                   |     |     |                                                            |
| 6  | Protocol          | 25  | 11  | Plans for communicating important protocol                 |
| 7  | amendments        |     |     | modifications (eg, changes to eligibility criteria,        |
| 8  |                   |     |     | outcomes, analyses) to relevant parties (eg,               |
| 9  |                   |     |     | investigators, REC/IRBs, trial participants, trial         |
| 10 |                   |     |     | registries, journals, regulators)                          |
| 11 |                   |     |     |                                                            |
| 12 |                   |     |     |                                                            |
| 13 | Consent or        | 26a | 6   | Who will obtain informed consent or assent from            |
| 14 | assent            |     |     | potential trial participants or authorised surrogates,     |
| 15 |                   |     |     | and how (see Item 32)                                      |
| 16 |                   |     |     |                                                            |
| 17 |                   | 26b | n/a | Additional consent provisions for collection and use of    |
| 18 |                   |     |     | participant data and biological specimens in ancillary     |
| 19 |                   |     |     | studies, if applicable                                     |
| 20 |                   |     |     |                                                            |
| 21 |                   |     |     |                                                            |
| 22 | Confidentialit    | 27  | 6   | How personal information about potential and               |
| 23 | y                 |     |     | enrolled participants will be collected, shared, and       |
| 24 |                   |     |     | maintained in order to protect confidentiality before,     |
| 25 |                   |     |     | during, and after the trial                                |
| 26 |                   |     |     |                                                            |
| 27 |                   |     |     |                                                            |
| 28 | Declaration of    | 28  | 1   | Financial and other competing interests for principal      |
| 29 | interests         |     |     | investigators for the overall trial and each study site    |
| 30 |                   |     |     |                                                            |
| 31 | Access to         | 29  | n/a | Statement of who will have access to the final trial       |
| 32 | data              |     |     | dataset, and disclosure of contractual agreements          |
| 33 |                   |     |     | that limit such access for investigators                   |
| 34 |                   |     |     |                                                            |
| 35 | Ancillary and     | 30  | n/a | Provisions, if any, for ancillary and post-trial care, and |
| 36 | post-trial care   |     |     | for compensation to those who suffer harm from trial       |
| 37 |                   |     |     | participation                                              |
| 38 |                   |     |     |                                                            |
| 39 |                   |     |     |                                                            |
| 40 | Disseminatio      | 31a | 11  | Plans for investigators and sponsor to communicate         |
| 41 | n policy          |     |     | trial results to participants, healthcare professionals,   |
| 42 |                   |     |     | the public, and other relevant groups (eg, via             |
| 43 |                   |     |     | publication, reporting in results databases, or other      |
| 44 |                   |     |     | data sharing arrangements), including any publication      |
| 45 |                   |     |     | restrictions                                               |
| 46 |                   |     |     |                                                            |
| 47 |                   |     |     |                                                            |
| 48 |                   | 31b | n/a | Authorship eligibility guidelines and any intended use     |
| 49 |                   |     |     | of professional writers                                    |
| 50 |                   |     |     |                                                            |
| 51 |                   | 31c | n/a | Plans, if any, for granting public access to the full      |
| 52 |                   |     |     | protocol, participant-level dataset, and statistical code  |
| 53 |                   |     |     |                                                            |
| 54 |                   |     |     |                                                            |
| 55 | <b>Appendices</b> |     |     |                                                            |
| 56 |                   |     |     |                                                            |
| 57 | Informed          | 32  | n/a | Model consent form and other related documentation         |
| 58 | consent           |     |     | given to participants and authorised surrogates            |
| 59 | materials         |     |     |                                                            |
| 60 |                   |     |     |                                                            |

|   |            |    |     |                                                        |
|---|------------|----|-----|--------------------------------------------------------|
| 1 |            |    |     |                                                        |
| 2 | Biological | 33 | 4-5 | Plans for collection, laboratory evaluation, and       |
| 3 | specimens  |    |     | storage of biological specimens for genetic or         |
| 4 |            |    |     | molecular analysis in the current trial and for future |
| 5 |            |    |     | use in ancillary studies, if applicable                |
| 6 |            |    |     |                                                        |

---

7 \*It is strongly recommended that this checklist be read in conjunction with the SPIRIT 2013  
8 Explanation & Elaboration for important clarification on the items. Amendments to the  
9 protocol should be tracked and dated. The SPIRIT checklist is copyrighted by the SPIRIT  
10 Group under the Creative Commons "[Attribution-NonCommercial-NoDerivs 3.0 Unported](#)"  
11 license.  
12  
13  
14  
15  
16  
17  
18  
19  
20  
21  
22  
23  
24  
25  
26  
27  
28  
29  
30  
31  
32  
33  
34  
35  
36  
37  
38  
39  
40  
41  
42  
43  
44  
45  
46  
47  
48  
49  
50  
51  
52  
53  
54  
55  
56  
57  
58  
59  
60

For peer review only
